1 **Selective whole-genome amplification reveals population genetics of *Leishmania braziliensis* directly from patient**  
2 **skin biopsies**

3 Olivia A. Pilling<sup>1</sup>, Cooper A. Grace<sup>2</sup>, João L. Reis-Cunha<sup>2</sup>, Alexander S. F. Berry<sup>1,#a</sup>, Matthew W. Mitchell<sup>3,#b</sup>, Jane A.  
4 Yu<sup>4,#c</sup>, Clara Malekshahi<sup>1</sup>, Elise Krespan<sup>1</sup>, Christina K. Go<sup>1</sup>, Cláudia Lombana<sup>1</sup>, Yun S. Song<sup>4,5</sup>, Camila F. Amorim<sup>1</sup>,  
5 Alexandro S. Lago<sup>6,7</sup>, Lucas P. Carvalho<sup>6,7</sup>, Edgar M. Carvalho<sup>6,7</sup>, Dustin Brisson<sup>3</sup>, Phillip Scott<sup>1</sup>, Daniel C. Jeffares<sup>2</sup>,  
6 Daniel P. Beiting<sup>1\*</sup>

7

8 <sup>1</sup>Department of Pathobiology, School of Veterinary Medicine, University of Pennsylvania, Philadelphia, Pennsylvania,  
9 United States of America

10 <sup>2</sup>Department of Biology, York Biomedical Research Institute, University of York, York, United Kingdom

11 <sup>3</sup>Department of Biology, School of Arts & Sciences, University of Pennsylvania, Pennsylvania, United States of America

12 <sup>4</sup>Computer Science Division, University of California, Berkeley, Berkeley, California, United States of America

13 <sup>5</sup>Department of Statistics, University of California, Berkeley, Berkeley, California, United States of America

14 <sup>6</sup>Serviço de Imunologia, Complexo Hospitalar Universitário Professor Edgard Santos, Universidade Federal da Bahia,  
15 Salvador, Bahia, Brazil

16 <sup>7</sup>Laboratório de Pesquisas Clínicas do Instituto de Pesquisas Gonçalo Moniz, Fiocruz Bahia, Brazil

17 \* Corresponding author

18 E-mail: [beiting@upenn.edu](mailto:beiting@upenn.edu) (DPB)

19

20 **Keywords:** Selective Whole Genome Amplification, SWGA, population genetics, *Leishmania braziliensis*, cutaneous  
21 leishmaniasis, neglected tropical disease, NTD, Brazil.

22

23

1 **ABSTRACT**

2 In Brazil, *Leishmania braziliensis* is the main causative agent of the neglected tropical disease, cutaneous leishmaniasis  
3 (CL). CL presents on a spectrum of disease severity with a high rate of treatment failure. Yet the parasite factors that  
4 contribute to disease presentation and treatment outcome are not well understood, in part because successfully isolating  
5 and culturing parasites from patient lesions remains a major technical challenge. Here we describe the development of  
6 selective whole genome amplification (SWGA) for *Leishmania* and show that this method enables culture-independent  
7 analysis of parasite genomes obtained directly from primary patient skin samples, allowing us to circumvent artifacts  
8 associated with adaptation to culture. We show that SWGA can be applied to multiple *Leishmania* species residing in  
9 different host species, suggesting that this method is broadly useful in both experimental infection models and clinical  
10 studies. SWGA carried out directly on skin biopsies collected from patients in Corte de Pedra, Bahia, Brazil, showed  
11 extensive genomic diversity. Finally, as a proof-of-concept, we demonstrated that SWGA data can be integrated with  
12 published whole genome data from cultured parasite isolates to identify variants unique to specific geographic regions in  
13 Brazil where treatment failure rates are known to be high. SWGA provides a relatively simple method to generate  
14 *Leishmania* genomes directly from patient samples, unlocking the potential to link parasite genetics with host clinical  
15 phenotypes.  
16

17 **AUTHOR SUMMARY**

18 *Leishmania braziliensis* is the main cause of cutaneous leishmaniasis in Brazil. Due to limitations in culturing, it is  
19 important to study the parasite in a culture-independent manner. We use selective whole genome amplification (SWGA)  
20 to explore parasite genomic diversity directly from patient biopsies. This method is inexpensive and can be broadly used  
21 to generate parasite genome sequence data sampled from different *Leishmania* species infecting different mammalian  
22 hosts. We found high diversity among the *L. braziliensis* genomes from Bahia, Brazil, which correlated with geographic  
23 location. By integrating these data with publicly available genome sequences from other studies spanning four countries in  
24 South America, we identified variants unique to Northeast Brazil that may be linked to high regional rates of treatment  
25 failure.  
26  
27

## 1 INTRODUCTION

2 *Leishmania* constitutes a genus of intracellular protozoan parasites whose species are all transmitted by the bite of  
3 an infected phlebotomine sand fly and can lead to leishmaniasis. This neglected tropical disease has a spectrum of clinical  
4 presentations, including visceral and cutaneous, which vary in severity and are influenced by parasite species and strain  
5 genetics [1,2]. The most common form of disease caused by these parasites is cutaneous leishmaniasis (CL), which is  
6 characterized by one or more localized skin ulcers. Moreover, up to 10% of patients can develop more severe forms of the  
7 disease, such as mucosal (ML) or disseminated leishmaniasis (DL)[2]. Worldwide there are 700,000 to 1 million new  
8 cases of CL annually [3]. Although mortality is low for patients with CL, the disease is disfiguring, leads to chronic and  
9 systemic inflammation [4], and adversely impacts quality of life.

10 In Brazil, CL cases are largely caused by *Leishmania braziliensis*. Previous population genetics studies of this  
11 species have relied on low-resolution techniques, such as multilocus sequence typing and restriction fragment length  
12 polymorphism, both of which only consider a small set of genetic loci. Collectively, these studies have shown that the  
13 genetic diversity of *L. braziliensis* is higher in and around the Amazon rainforest than near the coast [5,6]. Moreover,  
14 recent whole genome sequencing studies have determined that *L. braziliensis* exhibits higher intraspecies genetic variation  
15 than other *Leishmania* species [7,8]. Variation in virulence, drug resistance, and clinical phenotype among strains has  
16 been observed in many parasites. A recent study using random amplified polymorphic DNA analysis showed that *L.*  
17 *braziliensis* genotypes are associated with disease presentation in patients [9]. Collectively, these studies underscore the  
18 importance of generating high-resolution genotyping data from *L. braziliensis* to identify genetic variants linked to disease  
19 severity and treatment outcome in CL patients.

20 We recently showed that *L. braziliensis* burden in patients is a strong predictor of inflammation, pathology, and  
21 poor response to chemotherapy, yet the parasite factors that contribute to differences in parasite load between patients  
22 have been difficult to address [10]. Technical and biological factors associated with culture adaptation of *L. braziliensis*  
23 and limited economic resources in endemic regions further complicate efforts to generate high-resolution genomic data  
24 from this important species. Unlike other *Leishmania* species, *L. braziliensis* is characterized by relatively slow growth  
25 and low parasitemia, which pose a major challenge to isolating parasites from patient lesions [11,12]. Even when parasites  
26 are successfully adapted to culture, some studies suggest that drug resistance markers identified from *in vitro* assays may  
27 not be driving drug resistance observed in the clinic, and the process of isolating parasites from primary patient samples  
28 may transiently alter chromosomal copy number [13–15]. There is an urgent need for culture-independent methods to  
29 circumvent these issues. Since parasitemia at the site of infection in the skin is extremely low during *L. braziliensis*  
30 infection, a direct metagenomic sequencing approach is not a viable alternative to culture. Enrichment of *Leishmania*  
31 *donovani* genomes from primary patient samples was recently published using Agilent SureSelect arrays which utilize  
32 custom RNA ‘bait’ sequences used to capture *Leishmania* genomic DNA for subsequent amplification [15]. However, this  
33 method is expensive, requires specialized reagents, and is specific to parasites causing visceral leishmaniasis (*L. donovani*  
34 and *L. infantum*).

35 In this study, we develop a selective whole genome amplification (SWGA) protocol to selectively amplify *L.*  
36 *braziliensis* directly from primary patient samples. SWGA is based on the use of organism-specific, short oligonucleotide  
37 primers and a high-fidelity, highly processive polymerase to preferentially amplify large segments of the target genome.  
38 Effective SWGA protocols have resulted in sequencing-ready samples that are enriched for specific target microbial  
39 genomes and which have been used to address biologically important questions in several microorganisms, including  
40 *Mycobacterium tuberculosis*, *Wolbachia* spp., *Plasmodium* spp., *Neisseria meningitidis*, *Coxiella burnetii*, *Wuchereria*  
41 *bancrofti*, and *Treponema pallidum* [16–30]. The ability to carry out SWGA without specialized equipment or reagents  
42 makes it feasible to implement in low- and middle-income countries (LMICs) where laboratory resources may be limited  
43 [16,21]. Here we report the development of SWGA for *Leishmania* and show that this method enables robust  
44 amplification of *L. braziliensis* DNA from complex metagenomic samples obtained from patients and experimental mouse  
45 models of infection. We investigate SNPs, indels, and somy in the parasite genomes directly sequenced from primary  
46 patient samples. Ultimately, we reveal the population genetic structure of *L. braziliensis* in Corte de Pedra, Bahia, Brazil,  
47 and compare these genomes to previously published *L. braziliensis* genomes.

## 1 RESULTS

### 2 Validation of SWGA for *Leishmania in silico* and using synthetic controls

3 We used the improved SWGA algorithm, `swga2.0`, which employs machine learning to design primer sets that  
4 preferentially bind to a target genome, compared to one or more background genomes ([31]; see Methods). We used *L.*  
5 *braziliensis* (MHOM/BR/75/M2904 2019) as the target genome and the human genome as background. Genomes from  
6 *Staphylococcus aureus* and *Streptococcus pyogenes* were also included as background since both are skin commensals  
7 that we previously reported to be common members of the dysbiotic skin microbiome on *L. braziliensis* lesions [32]. We  
8 calculated the expected number of perfect match binding sites – across a range of parasite and host genomes – for each of  
9 the 23, 8-mer primer sequences designed by the SWGA algorithm (**Supplementary Table 1**). This *in silico* analysis  
10 showed that our SWGA primers had a median of 15 (8.4 - 27.5) ‘hits’, or exact matches, per million base pairs (Mbp) of  
11 the *L. braziliensis* genome and a median of 0.22 (0.16 - 0.60) hits per Mbp of the human genome (**Figure 1A**) – a nearly  
12 60-fold (27- to 100-fold) enrichment in predicted binding to the parasite genome compared to host (**Figure 1B**). We next  
13 tested whether our SWGA primers would be predicted to work when applied to other *Leishmania* species and/or when  
14 other host species were involved. Multiple species of *Leishmania* cause disease in humans, and several infect canines that  
15 are sympatric with humans. In addition, many *Leishmania* species are used to experimentally infect rodent models for  
16 research. *L. major*, *L. donovani*, *L. infantum*, and *L. amazonensis* all exhibited similar results with our SWGA 8-mers as  
17 *L. braziliensis*, with median hits per Mbp of 16.8, 15.5, 16.0, and 16.3, respectively (**Figure 1A**). Similarly, when our  
18 primers were tested against mouse or canine reference genomes, we observed 53-fold and 34-fold enrichment,  
19 respectively, of predicted primer binding to the *L. braziliensis* genome over these hosts (**Figure 1B**). Taken together, these  
20 *in silico* data suggest that primers designed using SWGA are valuable in a wide range of contexts, from natural infection  
21 of humans and canines to experimental infections of mice.

22 *L. braziliensis* is known to be present at low levels in skin lesions. Less than 1% of total reads from RNA-seq  
23 studies of lesions map to the parasite [10]. To evaluate the efficacy of our SWGA assay in a controlled setting that  
24 mimics patient samples, we prepared purified human DNA spiked with either 1% or 0.1% (w/w) purified *L. braziliensis*  
25 genomic DNA. Using high-throughput sequencing, we evaluated the ability of four separate SWGA primer sets, each  
26 consisting of 10 SWGA primers, to selectively amplify parasite DNA in these synthetic samples. After a 16-hour  
27 isothermal SWGA reaction, we found that multiple primer sets resulted in substantial amplification of the synthetic  
28 samples. Primer set 1 (PS1) and PS4 yielded the best results, achieving  $\geq 60\%$  of parasite-mapping reads in samples that  
29 started with only 1% or 0.1% *L. braziliensis* DNA (**Figure 1C**). We next examined the depth and breadth of coverage  
30 following SWGA of these synthetic samples. For each sample, sequencing data from individual SWGA reactions (PS1,  
31 PS2, PS3, PS4) were combined and mapped to the parasite genome, and depth and breadth of coverage were evaluated at  
32 different sequencing efforts. In the 1% spike-in control, after SWGA, a sequencing effort of  $\sim 100\text{M}$  paired-end reads  
33 (**Figure 1D, top, vertical dashed line**) yielded 10x coverage across nearly 90% of the parasite genome, and 5x coverage  
34 across over 94% of the genome. Similarly, when the synthetic sample containing only 0.1% parasite DNA was used, the  
35 same sequencing effort resulted in 10x coverage across over 70% of the parasite genome and 5x coverage across 84% of  
36 the genome (**Figure 1D, bottom, vertical dashed line**). These data show that even when *L. braziliensis* DNA is present at  
37 incredibly low levels, and in the presence of abundant contaminating human DNA, SWGA yields an excellent breadth of  
38 coverage across the 32Mbp parasite genome.

### 10 Validation of SWGA assay on mouse and primary human samples

11 Based on our *in silico* analysis (**Figure 1A-B**), we predicted that our SWGA primer sets would be effective in  
12 other species of *Leishmania*, as well as in other host backgrounds. To formally test this, we infected mice with either *L.*  
13 *braziliensis* (same target parasite species, but different host species background) or *L. major* (different parasite and  
14 different background) and carried out SWGA on DNA extracted from whole ears recovered from these mice. Tissues  
15 from experimentally infected mice have nearly undetectable levels of parasite sequences prior to SWGA (**Figure 2A**).  
16 After SWGA, however, the proportion of parasite reads increased to over 20% in one animal infected with *L. braziliensis*

1 and three animals infected with *L. major* (**Figure 2A, circles and triangles, respectively**). Parasite burdens with *L.*  
2 *major* are generally higher than with *L. braziliensis*, suggesting that SWGA is more effective as parasite burden increases.

3 We next tested our SWGA protocol on primary patient samples. DNA extracted from skin punch biopsies from  
4 16 *L. braziliensis* patients was subjected to high-throughput sequencing before and after SWGA. Reads from these pre-  
5 and post-SWGA samples for each patient were mapped to the parasite genome to evaluate depth and breadth of coverage.  
6 Direct sequencing of DNA extracted from lesions showed that less than 0.5% of reads mapped to the parasite before  
7 SWGA (**Figure 2B, 'pre'**), consistent with the mouse data above and previous reports of extremely low parasite burden in  
8 *L. braziliensis* lesions [10]. However, following SWGA, these same samples showed dramatic increases in the proportion  
9 of parasite-mapping reads, ranging from 2% to 55%, with over half of the patient samples (9/16) having  $\geq 20\%$  of reads  
10 mapping to the parasite (**Figure 2B, 'post', dashed line**). To better evaluate the specificity of our SWGA primer design  
11 in the context of primary patient samples, we measured read mapping in pre- and post-SWGA from these 9 samples.  
12 Specifically, we evaluated reads mapping to the foreground genome (*L. braziliensis* nuclear), background genome  
13 (human, *Staphylococcus aureus*, and *Streptococcus pyogenes*), and genome sequences excluded from SWGA primer  
14 design (*L. braziliensis* kinetoplast genome). Prior to SWGA, *S. aureus*, *S. pyogenes*, and *Leishmania* kinetoplast  
15 maxicircle combined accounted for less than 0.005% of the reads (**Supplementary Figure 1**). Following SWGA, the  
16 proportion of human reads decreased to around 55%, *L. braziliensis* reads increased to around 45%, while reads mapping  
17 to bacterial and *Leishmania* maxicircle reads remain below 0.1% (**Supplementary Figure 1**). These data show that  
18 SWGA is highly specific for the nuclear genome of *Leishmania*.

19 Next, we selected SWGA data from a single patient sample (**#7; Figure 2B, blue point**) and measured coverage  
20 across the parasite genome (**Figure 2C**), which showed that over 80% of the genome was covered at 10x depth by  
21 SWGA, and over 50% of the genome at 50x. Based on these data, we reasoned that SWGA may be a useful tool for  
22 monitoring parasite genotypes linked to drug resistance and disease phenotypes. SWGA data from the same patient  
23 sample was evaluated for coverage across the full length of each of the 35 parasite chromosomes (**Supplemental Figure**  
24 **2**). We focused our initial analysis on chromosomes 10, 23, and 31 since they encode the GP63, MRPA, and AQP1 genes,  
25 respectively, which have previously been linked to drug resistance in other *Leishmania* species [33–36]. In addition,  
26 chromosome 31 is known to have extra copies that have been linked to parasite adaptation to stress [37–39]. Lastly, we  
27 examined chromosome 28 because it has been linked to atypical manifestations of CL [40,41]. We observed over 10x  
28 coverage across most of the length of each of these chromosomes following SWGA (**Figure 2D, blue lines**). Regions that  
29 showed the poorest coverage in our SWGA samples often corresponded to ends of chromosomes or to regions (**Figure**  
30 **2D, brackets**) that were also poorly covered in whole genome sequencing (WGS) of pure cultures of *L. braziliensis*  
31 (**Figure 2D, orange lines**). This result likely reflects low complexity regions that pose a challenge to genome sequencing  
32 for *L. braziliensis*, rather than issues specific to SWGA. Fluctuations in coverage observed in our SWGA data across the  
33 chromosome may be due to SWGA-inherent multiple displacement amplification (MDA), which makes it impossible to  
34 parse apart quantitative genetic information like gene copy number variation. These data indicate that SWGA directly  
35 applied to primary patient samples generates high-quality data suitable for high-resolution parasite genotyping.

### 38 Somy analysis with SWGA

39 *Leishmania* parasites exhibit mosaic aneuploidy, and it has been suggested that modulating chromosomal copy  
40 number provides the parasite with a mechanism for regulating gene dosage in the absence of promoter-driven gene  
41 expression [42,43]. Previous attempts to use allele frequency to estimate somy of *L. infantum* were unsuccessful due to a  
42 low number of heterozygous SNPs in this parasite species [44]. Since *L. braziliensis* has been reported to have a higher  
43 number of SNPs than other *Leishmania* species [7], we tested whether the alternate allele read depth proportion  
44 (AARDP), as determined by SWGA, could be used to infer chromosome copy number. We first examined AARDP in  
45 DNA isolated from pure *L. braziliensis* cultures and subjected to either traditional WGS or SWGA (**Figure 3A and 3B,**  
46 **respectively**). Allele read depth distributions can be influenced by differential variations in chromosome copies within  
47 the cell population from a sample. Nevertheless, we still observed sharp peaks in the WGS sample centered over an

1 AARDP of 0.5, suggesting that chromosomes 10, 23, and 28 were disomic. In contrast, three distinct peaks were  
2 observed for chromosome 31 centered on an allele frequency of 0.25, 0.50, and 0.75, consistent with multiple previous  
3 reports that this chromosome is supernumerary, and potentially tetrasomic [37]. SWGA of the same pure culture closely  
4 resembled the WGS data, albeit with allele frequency peaks that were slightly less sharp (**Figure 3B**). SWGA of synthetic  
5 spike-in controls showed a similar profile at 1% parasite DNA (**Figure 3C**), which was diminished when parasite DNA  
6 dropped to 0.01% (**Figure 3D**), suggesting that extremely low parasite abundance will adversely impact the utility of  
7 SWGA for some estimation. AARDP analysis of SWGA data from two of the 18 patient samples showed evidence of a  
8 supernumerary state for chromosomes 23 in patient 7 (potentially tetrasomic; **Figure 3E**) and chromosome 28 in patient  
9 61 (potentially disomic; **Figure 3F**).

## 12 **A high-throughput screen of patient samples using SWGA**

13 Routine diagnosis of *L. braziliensis* infection is carried out by collection of a punch biopsy from the site of the  
14 skin lesion followed by DNA extraction and parasite-specific PCR. We reasoned that this original DNA extract from a  
15 diagnostic biopsy, which is often archived for retesting purposes, could be sufficient for large-scale generation of parasite  
16 genomes by SWGA. To test this, we devised a screening approach that allowed us to scale our SWGA assay by an order  
17 of magnitude. 165 archived patient samples, of which 51 were intact skin biopsies and 114 were diagnostic DNA samples,  
18 were acquired from the health clinic in Corte de Pedra, Brazil. We anticipated that successful SWGA reactions would be  
19 positively correlated with parasite burden, therefore, our screen involves first prioritizing samples for SWGA using a  
20 parasite-specific qPCR [45] (**Figure 4A**). Based on qPCR results, 66 patient samples with the highest parasite burden were  
21 selected for SWGA (**Supplementary Table 2**). SWGA reactions were then arrayed in 96-well plates using different  
22 SWGA primer sets (**Figure 4B**). Since PS2 and PS3 performed more poorly on synthetic samples (**Figure 1C**), we chose  
23 to use these primer sets only in second-round SWGA reactions that had first undergone an initial round of SWGA with  
24 PS1 or PS4. These ‘nested’ SWGA reactions aim to amplify greater breadth of the parasite genome. Following SWGA,  
25 sequencing libraries were prepared, pooled, and subjected to shallow sequencing (**Figure 4C**). For each patient sample, all  
26 SWGA reactions yielding  $\geq 20\%$  reads mapping to the parasite from a shallow sequencing run were considered successful.  
27 The corresponding libraries were re-pooled (**Figure 4D**) and subjected to re-sequencing (**Figure 4E**). This screen of 66  
28 patient samples yielded parasite genomes from 18 patients (27% success rate) with a median percentage of the parasite  
29 genome covered at  $\geq 10x$  of 86.6% and a median genome coverage of 38x (**Figure 4F**). Given broad coverage across each  
30 of the 18 parasite genomes generated by SWGA, we next sought to call single nucleotide polymorphisms (SNPs) and  
31 insertions/deletions (INDELs) against the reference *L. braziliensis* genome. Across all 18 SWGA-generated genomes we  
32 observed a median of 85,032 SNPs and 17,857 INDELs, a finding that is consistent with the number of SNPs/INDELs  
33 previously reported in genome sequences from cultured isolates of *L. braziliensis* [7].

## 36 **Integrating SWGA and WGS genomes for population genomics of *L. braziliensis* in South America**

37 Several *L. braziliensis* genomes have been generated from cultured parasite isolates, which prompted us to ask  
38 whether SWGA generates genomes of sufficient quality to compare with isolate data for large-scale population genomic  
39 studies. We carried out an integrated analysis of our 18 *L. braziliensis* SWGA genomes together with 41 publicly  
40 available *L. braziliensis* genomes generated from cultured isolates, including 4 from Bahia, Brazil [46], 10 from  
41 Pernambuco, Brazil [7], 1 from Rondônia, Brazil [47], 18 from Peru [47], 6 from Colombia [8], and 2 from Bolivia [8,47].  
42 Collectively, these 59 genomes span a wide geographic range (**Figure 5A**), with our SWGA samples contributing  
43 genomes from areas of Bahia, Brazil that were not previously covered by other studies (**Figure 5B**). Principal component  
44 analysis (PCA) of SNP data from these genomes shows clear separation by geographic location (**Figure 5C**), with *L.*  
45 *braziliensis* genomes from Brazil clustering tightly together (**Figure 5C, upper right**) but distinct from Colombian,  
46 Peruvian, and Bolivian isolates. Two genomes from a forested region of Brazil appear distinct from other Brazil samples  
47 [7], while a single genome from Rondônia in Western Brazil – bordering Bolivia – clustered with the

1 Peru/Bolivia/Colombia isolates (**Figure 5C, lower right**). These data support the hypothesis that geography influences  
2 population genetic structure in *L. braziliensis*. Upon closer examination of the dense cluster of highly similar genome  
3 sequences from Northeastern Brazil (**Figure 5C, inset**), we observed a separation between SWGA sequences from Bahia  
4 (inset; triangles) and those from Pernambuco (inset; circles). To confirm that this separation was not an artifact of using  
5 SWGA, we included two control samples in which genome sequence data was generated from the same cultured  
6 laboratory clone of *L. braziliensis* from Brazil by either traditional WGS (**Figure 5C, inset; black circle**) or SWGA  
7 (**white triangle**). These two data points are indistinguishable from each other on PCA and cluster with other genomes  
8 from Brazil, demonstrating that the SWGA method itself is not likely to be a significant contributor to the variation  
9 observed in this analysis.

10 To view the genomic variation for these 59 genomes with more clarity, we plotted the first four principal  
11 components – which collectively account for over 38% of the total variance – separately, allowing us to see how each  
12 sample contributes to each principal component (**Figure 5D**). When viewed in this way, PC1 clearly separates two of the  
13 Colombia isolates from all other genomes, consistent with a high number of SNPs previously described for these samples  
14 [8]. PC2 separates Brazil samples from all other samples, regardless of whether they are from SWGA or WGS of cultured  
15 isolates. PC3 separates the two WGS samples from Paudalho, Pernambuco, Brazil, from all others, while PC4 separates  
16 samples originating from Colombia versus Peru. Collectively, these data point to country and, to a much smaller extent  
17 regional differences, as being associated with genetic variation in *L. braziliensis*. Our data show that integrating these data  
18 opens the door to comparing SWGA data in the context of a growing number of WGS datasets for *L. braziliensis*.

19 Phylogenetic analysis supports the hypothesis that both the forested Pernambuco, Brazil samples and two samples  
20 from Colombia are quite unique (**Figure 5E**). Like the PCA, this tree shows that the single sample from Western Brazil is  
21 more similar to samples from Peru and Bolivia. The SWGA samples form a monophyletic clade with previously  
22 published genomes also from Bahia, Brazil, and are closely related to the non-forest Pernambuco, Brazil samples. Since  
23 we integrated our SWGA genomes with published WGS genomes, we wanted to rule out a potential issue in which  
24 uneven coverage from SWGA, but not WGS, could contribute to the structure observed our phylogenetic tree. To evaluate  
25 the robustness of the tree to loss of signal, we dropped 20%, 40%, or 60% of the SNPs, each time regenerating the tree  
26 (**Supplementary Figure 3**). We found that > 40% of the SNPs must be removed before our SWGA samples no longer  
27 form a monophyletic clade with the published Bahia genomes generated by WGS, and instead become sister clades. Our  
28 phylogenetic analysis further supports the conclusion that SWGA and WGS genomes can be compared, since our cultured  
29 laboratory clone of *L. braziliensis* falls within the same clade with extremely short branch lengths and a high bootstrap  
30 value.

### 32 **Identifying variants unique to Northeast Brazil where treatment failure rates are high**

33 None of the previously published *L. braziliensis* genomes have reported treatment outcome for patients from  
34 which isolates were generated. Thus, our SWGA genomes are the only ones with available treatment outcome data,  
35 leaving us underpowered to test for parasite polymorphisms linked to treatment outcome. However, treatment failure  
36 rates are reportedly high in Northeastern (NE) Brazil [48] and our SWGA genomes cover a region in NE Brazil not well  
37 represented by previous WGS studies. This, together with the fact that many of our SWGA genomes (15/18) came from  
38 patients who failed therapy with pentavalent antimony (**Supplementary Table 2**), prompted us to ask whether our data  
39 could be used in a proof-of-concept exercise to identify parasite variants unique to NE Brazil and, therefore, potentially  
40 linked to treatment failure. Toward this end, we carried out a systematic identification and annotation of genomic variants  
41 from all 59 *L. braziliensis* genomes available, yielding over 600,000 high-quality variants, including nearly 110,000  
42 missense and 634 frame-shift variants (**Figure 6A**, column labeled ‘S. America (total)’). Over 120,000 of these variants  
43 were present in our SWGA genomes (**Figure 6A**, column labeled ‘SWGA (total)’), and our data identified 5,812 novel  
44 variants not previously observed in other studies including 1,204 missense and 277 frame-shift variants (**Figure 6A**,  
45 column labeled ‘SWGA (new)’). Notably, nearly half of the total *L. braziliensis* frame-shift mutations were contributed  
46 by our SWGA data. To confirm that the relatively large number of frame-shift mutations observed in our experiments  
47 was not an artifact of SWGA, we examined the INDEL to SNP ratio for 4 SWGA genomes from Bahia, 4 WGS genomes

1 from Bahia, 4 WGS genomes from Pernambuco, and 4 WGS genomes from Peru. We found the INDEL to SNP ratio to  
2 be 0.256, 0.205, 0.217, and 0.179, respectively. Similarly, when we carried out WGS and SWGA on pure cultured  
3 parasites (**Figure 5**) we measured INDEL to SNP ratios of 0.251 and 0.219, respectively. Taken together, these data  
4 suggest a generally higher trend for this ratio in genomes from NE Brazil, rather than a technical issue that results in more  
5 INDELS in SWGA genomes.

6 Next, we focused our analysis on two types of variants, frame-shift and missense mutations, since they have a  
7 high potential for impacting protein sequence. In particular, we were interested in these variants when present in NE  
8 Brazil – including our 18 SWGA genomes and 14 genomes from two other studies [7,46] – but absent from genomes  
9 collected from Colombia, Bolivia, Western Brazil, and Peru (**Figure 6A**, column labeled ‘NE Brazil’). 316 frame-shift  
10 mutations were found to be specific to NE Brazil and occurred in 303 genes, of which 51% (154) were annotated as  
11 conserved hypothetical genes (**Supplementary Table 3**). Gene ontology enrichment analysis of the remaining 149 genes  
12 revealed enrichment of functional terms associated with post-translational modifications, including protein  
13 phosphorylation (2.7-fold enrichment; FDR = 0.03) (**Figure 6B, left**). In addition, we identified 13,831 missense  
14 mutations specific to NE Brazil. We reasoned that many of these variants were likely observed at low frequency (only  
15 found in one or a few samples), thus we further refined this list by selecting for variants that were observed at high  
16 frequency in NE Brazil but not elsewhere (see methods). This analysis yielded 1916 variants. To focus on genes with the  
17 potential to be most impacted by these mutations, we selected only genes that had  $\geq 2$  of these missense mutations,  
18 resulting in a list of 347 genes, of which 52% (195) were conserved hypothetical proteins (**Supplementary Table 3**). GO  
19 analysis of the remaining 152 genes showed significant enrichment of ubiquitin transferase activity ( $> 6$ -fold enrichment;  
20 FDR = 0.01) (**Figure 6B, right**). Included amongst this list were 12 genes with putative kinase domains, 4 SPRY-  
21 domain/HECT-domain-containing (ubiquitin-transferase) proteins (LbrM.32.2.004170, LbrM.13.2.001230,  
22 LbrM.07.2.000290, and LbrM.35.2.006640), one ubiquitin carboxyl-terminal hydrolase (LbrM.16.2.000720), one putative  
23 E1 ubiquitin-activating enzyme (LbrM.34.2.002970), and two putative cullin protein neddylation domain-containing  
24 proteins (LbrM.16.2.001260 and LbrM.25.2.001240) (**Supplementary Table 3**). Five RNA binding proteins were also  
25 identified in this analysis (LbrM.18.2.000200, LbrM.18.2.001450, LbrM.24.2.001860, LbrM.29.2.001510,  
26 LbrM.30.2.001230, and LbrM.33.2.001710). In some cases, these genes had high frequency variants both within and  
27 outside of NE Brazil, but present at different locations in the gene (**Figure 6C and 6D**). For other genes, high frequency  
28 missense mutations were only observed in NE Brazil (**Figure 6E and 6F**). Collectively, these proof-of-concept results  
29 underscore the potential for SWGA to allow researchers to link genetic polymorphisms in *Leishmania* with experimental  
30 covariates and raise the possibility that *L. braziliensis* strains circulating in NE Brazil may undergo unique post-  
31 transcriptional or post-translational modifications.

## 34 DISCUSSION

35 The slow growth of *L. braziliensis*, combined with low parasite burden present at the site of the lesion and relative  
36 scarcity of infrastructure to support high-throughput sequencing in areas endemic for CL, have made it difficult to isolate,  
37 culture, and sequence a diverse range of parasite strains for population genomic studies. One recent strategy for  
38 addressing these challenges in *L. donovani* used custom biotinylated ‘bait’ sequences and streptavidin-conjugated beads  
39 (Agilent SureSelect technology) to enrich for parasite DNA in samples from visceral leishmaniasis patients [15]. This  
40 method may have several advantages over SWGA. For example, SureSelect is likely to be more sensitive than SWGA  
41 and can amplify parasite genomes from samples with as low as 0.006% *Leishmania* DNA [15]. This could be particularly  
42 important for generating parasite genomes from patients with mucosal leishmaniasis, or from patients that cure following  
43 a single round of antimony treatment, as both these patient populations tend to have very low parasite burden. Although it  
44 remains to be tested, in theory the efficiency of SureSelect technology should not be impacted by host background. In  
45 contrast, SWGA primers will likely need to be redesigned for host backgrounds that differ significantly from human  
46 (e.g. sandfly vector). However, the relatively high cost of SureSelect assays coupled with the need to redesign new baits  
47 for different species of *Leishmania* and the high amount of input DNA required (minimum 100 ng) limit more widespread



1 adoption of this approach. The data presented here show that simple pools consisting of ten 8-mer primers can be used to  
2 selectively amplify *L. braziliensis* genomes – and likely *L. major* – from complex primary patient samples. Aside from  
3 these oligonucleotide primers, only the Phi29 polymerase is needed and the SWGA proceeds as an isothermal room-  
4 temperature reaction, bypassing the need for a thermocycler. Since SWGA is an amplification-based protocol, only small  
5 amounts of total DNA (as low as 5ng) are needed. Taken together, our data show that SWGA is a low-cost and easily  
6 scalable method to generate high resolution population genomic data from *Leishmania* species, even in resource-limited  
7 areas.

8 Although we successfully amplified 18 parasite genomes from primary patient samples, this represented only a  
9 27% success rate from the 66 samples we attempted to amplify with SWGA. One open question is how the efficiency of  
10 the SWGA method can be improved so that a higher number of patient samples yield parasite genomes. Host-specific  
11 restriction enzymes [20,49] may offer one appealing solution for *Leishmania*, particularly since *L. donovani* reportedly  
12 lacks C-5 DNA methylation, potentially opening the doors to using methylation-sensitive restriction enzymes to  
13 preferentially degrade host DNA [50]. Based on our data from SWGA of synthetic controls (**Figure 1C**), primer sets 1  
14 and 4 yielded the greatest percent of reads aligning to *L. braziliensis*, while primer sets 2 and 3 performed more poorly.  
15 Interestingly, sets 1 and 4 share more primers in common with each other, than they do with sets 2 and 3 (**Supplementary**  
16 **Table 1**). Thus, we could use the sequences in sets 1 and 4 to refine the SWGA algorithm to identify new primers that  
17 may demonstrate improved performance. Despite these limitations, SWGA offers several exciting potential uses for  
18 *Leishmania* genetics. The Phi29 polymerase used in SWGA is highly processive and can produce amplicons up to 100kb  
19 or more in length, potentially allowing long-read sequencing of SWGA reactions to resolve complex regions in the  
20 parasite genome. We expect that SWGA will make capturing genomes of *Leishmania* parasites from sympatric  
21 mammalian hosts (e.g. human and canine) and insect vectors all from the same geographic area relatively straightforward,  
22 thus empowering the design of sophisticated population genetic studies.

23 Our 18 SWGA genomes included 15 from patients who failed treatment after a single round of chemotherapy  
24 with antimony (**Supplementary Table 2**). This bias in favor of successful SWGA of parasite genomes from patients who  
25 fail therapy is likely due to the higher parasite burden observed in these patients [10], thus putting the total amount of  
26 parasite DNA above a threshold for successful SWGA. Understanding why some patients have higher parasite load than  
27 others – prior to initiating chemotherapy – may help identify the root causes of treatment failure in this disease. There are  
28 many possible explanations, including variable parasite load in the insect vector, variability in host immunity, differential  
29 host immune evasion by the parasite, differing parasite replication rates, and more. All these potential explanations could  
30 involve parasite strain genetics, yet prior to this study little was known about how *L. braziliensis* strains in NE Brazil  
31 where failure rates are high, compared to those observed elsewhere in South America. Future studies to formally identify  
32 parasite variants associated with treatment outcome will require some consideration for how to successfully obtain  
33 genomes from patients who cure and, therefore, have the lowest parasite load prior to treatment. One potential solution  
34 would be to perform SWGA on skin biopsies collected from patients early in the course of disease, before the  
35 development of an ulcer. Previous studies have shown that this early stage of the disease is when parasite burden and  
36 failure rates are highest [51]. Notably, our screening approach (**Figure 4A-4E**), is scalable and could be used to tackle  
37 this challenge by rapidly testing many different samples and patients to identify the optimal setting to generate genomes  
38 from very low burden infections.

39 By integrating our SWGA genomes with public WGS data, we were able to carry out a population genetic study  
40 of *L. braziliensis* that spanned four S. American countries. As a proof-of-concept exercise, we identified variants unique  
41 to NE Brazil thus highlighting the feasibility of using SWGA data for genetic association studies in *L. braziliensis*. The  
42 high-frequency variants we identified in NE Brazil were enriched in protein kinases, RNA-binding proteins, and  
43 ubiquitin-transferases. We hypothesize that these mutations may impact RNA or protein stability in the parasites.  
44 Interestingly, *Leishmania* and *Trypanosoma* parasites lack traditional promoter-based gene regulation and thus rely  
45 heavily on post-transcriptional and post-translational mechanisms for modulating gene expression in the face of  
46 environmental stressors and cues [52,53]. For example, RNA binding proteins in *Trypanosomes* are critical for

1 differentiation of the parasite through its lifecycle [54,55]. Collectively, our data underscore the potential for SWGA to  
2 be used in population genomic studies to identify parasite genetic polymorphisms linked to experimental covariates.  
3  
4

## 5 **MATERIALS AND METHODS**

### 6 **Data and code availability**

7 Raw reads for all 18 SWGA genomes are available on the Sequence Read Archive (SRA) under accession number  
8 PRJNA875085. All code used for analysis of depth and breadth of coverage in SWGA samples, and annotation, analysis,  
9 and visualization of variants is available as a fully reproducible dockerized code “capsule” archived on Code Ocean  
10 (<https://doi.org/10.24433/CO.3705597.v2>).  
11

### 12 **Human and mouse sample collection**

13 Skin lesion biopsies were obtained with informed consent from cutaneous leishmaniasis (CL) patients seen at the  
14 Health Post of Corte de Pedra, Bahia, Brazil, in accordance with local ethical guidelines (Ethical Committee of the  
15 Federal University of Bahia Medical School, Salvador, Bahia, Brazil and the University of Pennsylvania Institutional  
16 Review Board). All samples were collected prior to initiating treatment. A 4-mm diagnostic punch biopsy was collected  
17 from the border of the lesion of CL patients and DNA was extracted using the Wizard Genomic DNA Purification Kit  
18 (Promega). CL diagnosis was determined by a positive skin lesion PCR for *L. braziliensis* and a positive intradermal skin  
19 test with *Leishmania* antigen. These diagnostic DNA samples were the same ones used in this study. For some patients,  
20 an additional biopsy was collected and stored in RNeasy (Thermo Fisher Scientific) for shipment. Biopsies were  
21 homogenized, and DNA was extracted using the MP Bio FastPrep Tissue Homogenizer and Qiagen Blood and Tissue kit  
22 according to the manufacturer's instructions.

23 For mouse experiments, *L. braziliensis* (MHOM/BR/01/BA788 strain) and *L. major* (Friedlin strain) parasites  
24 were grown in Schneider’s insect medium (GIBCO) supplemented with 20% heat-inactivated fetal bovine serum (Atlanta  
25 Biologicals) and 2 mM glutamine (Sigma). Metacyclic promastigotes were enriched from stationary-phase parasite  
26 cultures by density gradient centrifugation before infection as previously described [56]. Briefly, parasites were suspended  
27 in PBS and layered on a step gradient of 40% and 12% Ficoll 400 (Sigma) before centrifuging at 2400 rpm for 10  
28 minutes. C57BL/6 mice were infected intradermally in the ear with  $1 \times 10^6$  *L. braziliensis* or *L. major*. At the peak of ear  
29 swelling (~4-6 weeks post-infection), mice were humanely euthanized, ears were collected, homogenized, and DNA  
30 extracted as described above for human samples. All animal work was carried out in accordance with the  
31 recommendations in the Guide for the Care and Use of Laboratory Animals of the National Institutes of Health. The  
32 protocol was approved by the Institutional Animal Care and Use Committee, University of Pennsylvania.  
33

### 34 **SWGA primer design and validation**

35 We used the program *swga* [16] to generate a list of 172 candidate primers that preferentially bind to the  
36 *Leishmania braziliensis* reference genome (MHOM/BR/75/M2904 2019) over a complex background genome that  
37 consisted of human (GCA\_000001405.28), *Staphylococcus aureus* (GCA\_000746505.1), and *Streptococcus pyogenes*  
38 (GCA\_000006785.2). We scored these candidate primers and designed primer sets using an updated machine-learning-  
39 guided and thermodynamically-principled version of the SWGA algorithm, *swga2.0* [31](software available at  
40 <https://anaconda.org/janedwivedi/soapswga>). Overall, 23 unique 8-mer primers with the highest evaluation scores  
41 calculated from *swga2.0* were generated (Integrated DNA Technologies). The last two bases of the primers were  
42 phosphorothioated, which prevents primer degradation by phi29 polymerase [21]. *In silico* validation was carried out by  
43 counting exact matches for each SWGA primer against a range of target and background genomes using the Unix *grep*  
44 command, and hits per Mbp and the fold difference in predicted binding sites were calculated and visualized using Prism  
45 9. The target genomes included *L. braziliensis* (see above), *L. major* (TriTrypDB-55\_LmajorFriedlin), *L. donovani*  
46 (TriTrypDB-46\_LdonovaniBPK282A1), *L. infantum* (TriTrypDB-56\_LinfantumJPCM5), and *L. amazonensis*  
47 (TriTrypDB-56\_LamazonensisMHOMBR71973M2269). Background genomes included human

1 (Homo\_sapiens.GRCh38), *Mus musculus* (GCF\_000001635.27\_GRCm39), and *Canis lupus familiaris*  
2 (*Canis\_lupus\_familiaris.CanFam3.1*). The human, mouse, and canine reference genomes were filtered to only include the  
3 autosomal chromosomes, sex chromosomes, and mitochondrial DNA for the analysis. Primers were grouped into four  
4 sets of 10 primers each (**Supplementary Table 1**). FastQ Screen [57] (sampling  $10^6$  reads per sample) was used to assess  
5 the selectivity of the SWGA primers on 9 pre-SWGA and all 18 post-SWGA samples against a panel of different  
6 reference genomes including human, *S. aureus*, *S. pyogenes*, *L. braziliensis* and the *L. braziliensis* maxicircle. Proportion  
7 of reads mapping to each reference genome were visualized using Prism 9. Genomic DNA extracted from human foreskin  
8 fibroblasts (HFF) cells and an axenic culture of *L. braziliensis* promastigotes using the DNeasy Blood and Tissue kit  
9 (Qiagen) were mixed to generate 1% and 0.1% *L. braziliensis*:human DNA (w/w).

### 10 11 **SWGA on primary patient and mouse samples**

12 DNA from human or mouse samples was quantified using a Qubit 3.0 fluorometer. qPCR was performed on a  
13 ViiA 7 machine (Applied Biosciences) using SsoAdvanced Universal Probes Supermix (BioRad) for both *Leishmania*  
14 kinetoplast DNA [45] and the human 18S rRNA gene (Biomeme Inc). Ct values for *Leishmania* were normalized using  
15 the human 18S rRNA gene to prioritize lesions with the highest parasite burden for SWGA. All qPCR reactions were  
16 carried out in duplicate. SWGA was performed by combining ~50 ng of the sample DNA, 3.5mM of an SWGA primer  
17 set, 1x phi29 buffer, 30 U of phi29 polymerase enzyme (New England Biolabs), 4mM dNTPs (Thermo Fisher Scientific),  
18 1% bovine serum albumin and nuclease-free water in a total volume of 50 $\mu$ L. Thermocycler cycling conditions included a  
19 1 hr ramp down step (35 $\square$  to 30 $\square$ ; 10 min per degree), 16 hr amplification step at 30 $\square$ , 10 min denaturing step at 65 $\square$   
20 and hold at 4 $\square$ . Of the four primer sets reported here, PS1 and PS4 performed best, thus PS2 and PS3 were only used in a  
21 second round of SWGA following amplification with PS1 and PS4. For second-round SWGA reactions, ~50 ng of first-  
22 round SWGA product was subjected to a second round of SWGA with a different primer set. Ten ng of first-round or  
23 second-round SWGA product was used to generate libraries using the Hackflex [58] protocol and subjected to shallow  
24 sequencing on an Illumina NextSeq 500 or NextSeq 2000 to produce 1-4 million 75 or 150 single-end reads per SWGA  
25 reaction. Reads were trimmed with Trimmomatic [59], aligned to the appropriate *Leishmania* reference genome using  
26 Bowtie2 [60], and summarized with MultiQC [61]. All SWGA reactions that showed >20% reads aligning to *L.*  
27 *braziliensis* were pooled by patient and subsequently resequenced to generate  $\geq 100$  million paired-end 150 bp reads.  
28 Genome coverage was estimated based on the median gene coverage, excluding genes with outlier coverage, removed  
29 with iterative Grubbs' test.

### 30 31 **Variant calling, phylogeny, and some analysis**

32 Sequencing data from different SWGA primer sets were combined for each sample using the Unix *cat* command.  
33 In addition to data from the 18 SWGA samples, publicly available raw sequence reads were also obtained for 41 *L.*  
34 *braziliensis* cultured isolates from Colombia, Bolivia, Brazil, and Peru [7,8,46,47] that were subjected to whole genome  
35 sequencing (WGS). Reads were trimmed with Trimmomatic [59] (filtering parameters: LEADING:3 TRAILING:3  
36 SLIDINGWINDOW:4:15 MINLEN:36) and mapped to the *L. braziliensis* MHOM/BR/75/M2904 2019 reference genome  
37 using *bwa-mem v.0.7.17* [62]. Alignments were reported in bam files, which were sorted, and indexed with  
38 *SAMtools* [63], and reads were tagged with a sample ID using *Picard Tools AddOrReplaceReadGroups* [64]  
39 similar to previously described [65]. Genome coverage was estimated using *BEDtools genomecov* command with 100  
40 bp windows [66]. The percent of the *L. braziliensis* genome covered at  $\geq 1x$ ,  $5x$ , and  $10x$  was calculated from the resulting  
41 bed file. SNPs and indels were called using The Genome Analysis Toolkit (GATK) v.4.1.0.0 [67]  
42 *HaplotypeCaller* and *Freebayes v.1.3.2* [68] in 'discovery' mode, with a minimum alternative allele count set to  $\geq 5$ .  
43 Only variants found by both methods were retained for downstream analysis. The SWGA and WGS data were merged and  
44 sorted with *BCFtools v.1.9* [69] and re-genotyped using *Freebayes*. A bed file that contained only regions with  $\geq 10x$   
45 coverage in at least 14 out of the 18 SWGA samples was used to filter the SWGA and public WGS data for population  
46 and phylogenetic analysis.

1 For phylogenetic analysis, biallelic sites were selected with `BCFtools` [69], and variant calls were filtered by  
2 quality (`QUAL>500`) with `VCFtools` [70] and by linkage disequilibrium with `Plink v.1.9` [71] (parameters used:  
3  $r^2=0.5$ , step size=1, window size=10kb). Principal component analysis was carried out with `Plink v.1.9`. For  
4 phylogenetic tree generation, *L. guyanensis* MCAN/CO/1985/CL-085 (ERR205773) was mapped to the *L. braziliensis*  
5 reference as above to be used as an outgroup to root the tree. Sequences were extracted from the merged SWGA, public,  
6 and outgroup variant call format (VCF) file with `vcf2phylip v2.8` [72] and a maximum likelihood phylogenetic  
7 analysis was performed using `IQ-TREE v.2.0.6` [73] (parameters used: *ModelFinder Plus*, and 10000 bootstrap replicates  
8 for SH-aLRT). The resulting tree and geospatial data were visualized with `Microreact` [74]. To investigate the  
9 potential for lower breadth of coverage with SWGA to impact our phylogenetic analysis, we divided genomes into 10 kb  
10 segments and removed 20%, 40%, and 80% of the segments using `BEDtools` and `BCFtools`. The filtered VCF file  
11 went through the same workflow as above. Genomic variants were annotated with `snpeff` [75], which was configured  
12 using a custom database prepared from the *L. braziliensis* genome fasta file, coding sequence (CDS) fasta file, Gene  
13 Transfer Format (GFF) file, and codon usage data, all of which were obtained from `TriTypDB.org` (release 58) [76,77].  
14 Filtering of variants by quality and type was carried out using `Snpsift` [78], and comparisons of variants between any  
15 two sets of samples were carried out using the *isec* function from `BCFtools` [69]. For high-frequency variants,  
16 `snpsift` was used to identify only missense mutations with an allele count greater than the number of samples in the  
17 group (n=32 for NE Brazil, n=27 for non-NE Brazil). For example, since *Leishmania* is diploid, an allele count of 32 in a  
18 group of 32 samples could be achieved if all samples were heterozygous for a mutant allele or if half of the samples were  
19 homozygous. Data visualization was carried out using R/Bioconductor [79,80], the `vcfR` package [81], `ggplot2` [82],  
20 `DataGraph v4.7.1`, `Prism 9`, and `Sketch v91`. Chromosomal somy estimation was based on the proportion of reads in the  
21 alternate allele in biallelic heterozygous positions. VCF files were imported in R using `vcfR` and only biallelic positions  
22 were kept that had at least 10 reads in each allele and a total read depth of at least 30 and lower than 200. For each  
23 chromosome, the proportion of reads corresponding to the alternate allele in each SNP position was obtained and their  
24 distribution was used to infer the chromosomal somy.

## 25 26 27 28 29 **FIGURE LEGENDS**

30  
31 **Figure 1. SWGA primer design and evaluation.** (A) The number of exact match ‘hits’ per megabase (Mbp) for each of  
32 the 23 identified SWGA primers against *Leishmania* and host reference genomes, and (B) the fold difference in exact  
33 matches against *L. braziliensis* compared to human, mouse, or canine genomes. (C) Heatmap showing percent reads  
34 aligning to *L. braziliensis* for each of the four SWGA primer sets used to carry out SWGA on known ratios of *L.*  
35 *braziliensis* DNA spiked into human genomic DNA (0.1 and 1% final parasite DNA). (D) The number of reads is shown  
36 in relation to the percentage of the parasite genome covered at  $\geq 1x$  (blue line),  $5x$  (red line) and  $10x$  (green line). Vertical  
37 dashed line indicates a sequencing effort of  $100 \times 10^6$  150bp paired-end reads.

38  
39 **Figure 2. In vivo validation of SWGA for *Leishmania*.** Percentage of reads mapping to *L. braziliensis* genome in DNA  
40 from (A) infected mouse ears (n=3 animals infected with *L. major*, triangles; n=5 animals infected with *L. braziliensis*,  
41 circles) or (B) patient lesion biopsies, sequenced before (pre) and after (post) SWGA. Data shown are from the SWGA  
42 primer set the yielded the best amplification for each sample. (C) Genome coverage for SWGA data from a single patient  
43 sample (patient #7, blue point from panel B). (D) Coverage of four selected *L. braziliensis* chromosomes in SWGA data  
44 from a single patient (#7; blue lines) compared to whole genome sequencing (WGS) of pure, cultured *L. braziliensis*  
45 (orange lines). Data shown in panel C and D are merged from all SWGA primer sets to maximize coverage.

1 **Figure 3. Allele frequency determined by SWGA.** Alternate Allele Read Depth Proportion (AARDP) histograms for *L.*  
2 *braziliensis* chromosomes 10, 23, 28, and 31, for (A) whole genome sequencing (WGS) of pure cultured parasites, (B)  
3 SWGA of pure cultures, (C) SWGA on three patient samples from Figure 2A, or (D) synthetic controls consisting of 1%  
4 or 0.1% parasite DNA spiked into human DNA. Peaks centered on 0.5 indicate disomic chromosomes, while peaks at  
5 approximately 0.25, 0.5 and 0.75 indicate tetrasomic chromosomes. Green, red, and blue dashed lines denote an AARDP  
6 of 0.25, 0.5, and 0.75, respectively.

7  
8 **Figure 4. Scalable SWGA profiling of patient samples.** (A) QPCR is used to prioritize samples that have the highest  
9 parasite burden and, therefore, the greatest likelihood of success for SWGA. (B) SWGA is carried out in 96-well plates  
10 using multiple primer sets and primer set combinations (plate rows) for each patient (plate columns). (C) Shallow  
11 sequencing is used to determine which samples showed the best amplification by SWGA. (D) All successful SWGA  
12 reactions are pooled for each patient and (E) subjected to deep sequencing. (F) Results of selective whole genome  
13 amplification of *L. braziliensis* from 18 primary patient samples.

14  
15 **Figure 5. Integrating SWGA and WGS genomes for population genomics.** (A) Map showing all 59 samples, from  
16 this study and four previously published reports, included in the analysis. (B) Zoomed view of Bahia, Brazil showing  
17 region covered by samples from this study. White point indicates position of field hospital where patients were seen. (C-  
18 D) Principal component analysis of SNP data from 59 genomes, colored by country of origin. (E) Maximum likelihood  
19 tree constructed using 877713 variants from 59 *L. braziliensis* genomes and the *L. guyanensis* outgroup, compared to the  
20 *L. braziliensis* reference. Branch length of outgroup was shortened for figure preparation. Tree is rooted using the *L.*  
21 *guyanensis* outgroup. The same cultured laboratory clone of *L. braziliensis* from Brazil was sequenced either by  
22 traditional WGS (black circle) or SWGA (white triangle).

23  
24 **Figure 6. Identification of variants unique to Northeastern Brazil.** (A) Table showing variants identified by integrated  
25 analysis of WGS and SWGA genomes (top), and studies included (+) or excluded (-) from the analysis (bottom). Venn  
26 diagrams indicate how each of the five studies (labeled a-d) were used in the integrated analysis to generate the variants  
27 shown in table column above. (B) Bubble chart showing results of Gene Ontology (GO) enrichment for Molecular  
28 Function terms associated with 149 genes containing frame-shift variants (left) or 152 genes identified with high-  
29 frequency missense mutations in Northeast (NE) Brazil (right). All terms shown were associated with  $\geq 5$  genes. FC =  
30 fold change; FDR = false discovery rate (Benjamini-Hochberg correction). (C) Four representative parasite genes that  
31 were enriched for high-frequency missense mutations in genomes from Northeast Brazil.

32  
33 **Supplementary Figure 1. Specificity of SWGA primers for the *L. braziliensis* nuclear genome.** Plot showing number  
34 of reads (out of 100,000 subsampled reads) from each of 9 patient samples (points) that mapped to genomes of human, *L.*  
35 *braziliensis*, *Staphylococcus aureus*, *Streptococcus pyogenes*, and the *L. braziliensis* kinetoplast maxicircle.

36  
37 **Supplementary Figure 2. Genome-wide coverage by SWGA.** Coverage plots for all 35 *L. braziliensis* chromosomes in  
38 SWGA data from a single patient (#7; blue lines) compared to whole genome sequencing (WGS) of pure, cultured *L.*  
39 *braziliensis* (orange lines). Data were merged from all SWGA primer sets to maximize coverage.

40  
41 **Supplementary Figure 3. SWGA of *L. braziliensis* results in robust phylogenetic clustering.** (A) PCA plots (B) red  
42 inset from PCA plots shown in panel A, and (C) maximum likelihood phylogenetic trees showing relationship between  
43 our SWGA genomes (triangles) and previously published WGS samples (circles), all from Bahia, Brazil. Trees shown in  
44 panel C are focused on only the left-hand region of the tree shown in Figure 5E. White triangle and black circle indicate  
45 SWGA and WGS from cultured parasites, respectively.

## ACKNOWLEDGEMENTS

This study was funded in part by grants from the National Institute of Allergy and Infectious Diseases (5R01AI143790, 5T32AI007532-24, and 5R01AI149456-03). The funders had no role in study design, data collection and analysis, decision to publish, or preparation of the manuscript.

## BIBLIOGRAPHY

1. Burza S, Croft SL, Boelaert M. Leishmaniasis. *Lancet*. 2018;392: P951-970.
2. Scorza BM, Carvalho EM, Wilson ME. Cutaneous manifestations of human and murine leishmaniasis. *Int J Mol Sci*. 2017;18. doi:10.3390/ijms18061296
3. Alvar J, Vélez ID, Bern C, Herrero M, Desjeux P, Cano J, et al. Leishmaniasis worldwide and global estimates of its incidence. *PLoS ONE*. 2012;7: e35671. doi:10.1371/journal.pone.0035671
4. Farias Amorim C, O Novais F, Nguyen BT, Nascimento MT, Lago J, Lago AS, et al. Localized skin inflammation during cutaneous leishmaniasis drives a chronic, systemic IFN- $\gamma$  signature. *PLoS Negl Trop Dis*. 2021;15: e0009321. doi:10.1371/journal.pntd.0009321
5. Cupolillo E, Brahim LR, Toaldo CB, de Oliveira-Neto MP, de Brito MEF, Falqueto A, et al. Genetic polymorphism and molecular epidemiology of *Leishmania (Viannia) braziliensis* from different hosts and geographic areas in Brazil. *J Clin Microbiol*. 2003;41: 3126–3132. doi:10.1128/jcm.41.7.3126-3132.2003
6. Marlow MA, Boité MC, Ferreira GEM, Steindel M, Cupolillo E. Multilocus sequence analysis for *Leishmania braziliensis* outbreak investigation. *PLoS Negl Trop Dis*. 2014;8: e2695. doi:10.1371/journal.pntd.0002695
7. S L Figueiredo de Sá B, Rezende AM, Melo Neto OP de, Brito MEF de, Brandão Filho SP. Identification of divergent *Leishmania (Viannia) braziliensis* ecotypes derived from a geographically restricted area through whole genome analysis. *PLoS Negl Trop Dis*. 2019;13: e0007382. doi:10.1371/journal.pntd.0007382
8. Patino LH, Muñoz M, Cruz-Saavedra L, Muskus C, Ramírez JD. Genomic Diversification, Structural Plasticity, and Hybridization in *Leishmania (Viannia) braziliensis*. *Front Cell Infect Microbiol*. 2020;10: 582192. doi:10.3389/fcimb.2020.582192
9. Schriefer A, Schriefer ALF, Góes-Neto A, Guimarães LH, Carvalho LP, Almeida RP, et al. Multiclonal *Leishmania braziliensis* population structure and its clinical implication in a region of endemicity for American tegumentary leishmaniasis. *Infect Immun*. 2004;72: 508–514. doi:10.1128/iai.72.1.508-514.2004
10. Amorim CF, Novais FO, Nguyen BT, Misic AM, Carvalho LP, Carvalho EM, et al. Variable gene expression and parasite load predict treatment outcome in cutaneous leishmaniasis. *Sci Transl Med*. 2019;11. doi:10.1126/scitranslmed.aax4204

- 1 11. Niño A, Camacho M. *Leishmania* (*Viannia*) *braziliensis* growth in vitro culture relies more on folic acid  
2 availability than *Leishmania* (*Leishmania*) *amazonensis*. *Mem Inst Oswaldo Cruz*. 2005;100: 309–310.  
3 doi:10.1590/s0074-02762005000300017
- 4 12. Werner JK. Colombian strains of *Leishmania* from man: growth characteristics in culture media and hamsters.  
5 *Trans R Soc Trop Med Hyg*. 1981;75: 619–622. doi:10.1016/0035-9203(81)90130-9
- 6 13. Yardley V, Ortuno N, Llanos-Cuentas A, Chappuis F, Doncker SD, Ramirez L, et al. American tegumentary  
7 leishmaniasis: Is antimonial treatment outcome related to parasite drug susceptibility? *J Infect Dis*. 2006;194:  
8 1168–1175. doi:10.1086/507710
- 9 14. Rijal S, Yardley V, Chappuis F, Decuypere S, Khanal B, Singh R, et al. Antimonial treatment of visceral  
10 leishmaniasis: are current in vitro susceptibility assays adequate for prognosis of in vivo therapy outcome?  
11 *Microbes Infect*. 2007;9: 529–535. doi:10.1016/j.micinf.2007.01.009
- 12 15. Domagalska MA, Imamura H, Sanders M, Van den Broeck F, Bhattarai NR, Vanaerschot M, et al. Genomes of  
13 *Leishmania* parasites directly sequenced from patients with visceral leishmaniasis in the Indian subcontinent. *PLoS*  
14 *Negl Trop Dis*. 2019;13: e0007900. doi:10.1371/journal.pntd.0007900
- 15 16. Clarke EL, Sundararaman SA, Seifert SN, Bushman FD, Hahn BH, Brisson D. swga: a primer design toolkit for  
16 selective whole genome amplification. *Bioinformatics*. 2017;33: 2071–2077. doi:10.1093/bioinformatics/btx118
- 17 17. Sundararaman SA, Plenderleith LJ, Liu W, Loy DE, Learn GH, Li Y, et al. Genomes of cryptic chimpanzee  
18 *Plasmodium* species reveal key evolutionary events leading to human malaria. *Nat Commun*. 2016;7: 11078.  
19 doi:10.1038/ncomms11078
- 20 18. Guggisberg AM, Sundararaman SA, Lanaspá M, Moraleda C, González R, Mayor A, et al. Whole-Genome  
21 Sequencing to Evaluate the Resistance Landscape Following Antimalarial Treatment Failure With Fosmidomycin-  
22 Clindamycin. *J Infect Dis*. 2016;214: 1085–1091. doi:10.1093/infdis/jiw304
- 23 19. Oyola SO, Ariani CV, Hamilton WL, Kekre M, Amenga-Etego LN, Ghansah A, et al. Whole genome sequencing  
24 of *Plasmodium falciparum* from dried blood spots using selective whole genome amplification. *Malar J*. 2016;15:  
25 597. doi:10.1186/s12936-016-1641-7
- 26 20. Cowell AN, Loy DE, Sundararaman SA, Valdivia H, Fisch K, Lescano AG, et al. Selective Whole-Genome  
27 Amplification Is a Robust Method That Enables Scalable Whole-Genome Sequencing of *Plasmodium vivax* from  
28 Unprocessed Clinical Samples. *MBio*. 2017;8. doi:10.1128/mBio.02257-16
- 29 21. Leichty AR, Brisson D. Selective whole genome amplification for resequencing target microbial species from  
30 complex natural samples. *Genetics*. 2014;198: 473–481. doi:10.1534/genetics.114.165498
- 31 22. Cocking JH, Deberg M, Schupp J, Sahl J, Wiggins K, Porty A, et al. Selective whole genome amplification and  
32 sequencing of *Coxiella burnetii* directly from environmental samples. *Genomics*. 2020;112: 1872–1878.  
33 doi:10.1016/j.ygeno.2019.10.022
- 34 23. Itsko M, Retchless AC, Joseph SJ, Norris Turner A, Bazan JA, Sadjji AY, et al. Full Molecular Typing of *Neisseria*  
35 *meningitidis* Directly from Clinical Specimens for Outbreak Investigation. *J Clin Microbiol*. 2020;58.  
36 doi:10.1128/JCM.01780-20
- 37 24. Ibrahim A, Diez Benavente E, Nolder D, Proux S, Higgins M, Muwanguzi J, et al. Selective whole genome  
38 amplification of *Plasmodium malariae* DNA from clinical samples reveals insights into population structure. *Sci*  
39 *Rep*. 2020;10: 10832. doi:10.1038/s41598-020-67568-4
- 40 25. Benavente ED, Gomes AR, De Silva JR, Grigg M, Walker H, Barber BE, et al. Whole genome sequencing of  
41 amplified *Plasmodium knowlesi* DNA from unprocessed blood reveals genetic exchange events between  
42 Malaysian Peninsular and Borneo subpopulations. *Sci Rep*. 2019;9: 9873. doi:10.1038/s41598-019-46398-z

- 1 26. Thurlow CM, Joseph SJ, Ganova-Raeva L, Katz SS, Pereira L, Chen C, et al. Selective Whole-Genome  
2 Amplification as a Tool to Enrich Specimens with Low *Treponema pallidum* Genomic DNA Copies for Whole-  
3 Genome Sequencing. *mSphere*. 2022;7: e0000922. doi:10.1128/msphere.00009-22
- 4 27. Small ST, Reimer LJ, Tisch DJ, King CL, Christensen BM, Siba PM, et al. Population genomics of the filarial  
5 nematode parasite *Wuchereria bancrofti* from mosquitoes. *Mol Ecol*. 2016;25: 1465–1477. doi:10.1111/mec.13574
- 6 28. Morgan AP, Brazeau NF, Ngasala B, Mhamilawa LE, Denton M, Msellem M, et al. *Falciparum* malaria from  
7 coastal Tanzania and Zanzibar remains highly connected despite effective control efforts on the archipelago. *Malar*  
8 *J*. 2020;19: 47. doi:10.1186/s12936-020-3137-8
- 9 29. Osborne A, Manko E, Takeda M, Kaneko A, Kagaya W, Chan C, et al. Characterizing the genomic variation and  
10 population dynamics of *Plasmodium falciparum* malaria parasites in and around Lake Victoria, Kenya. *Sci Rep*.  
11 2021;11: 19809. doi:10.1038/s41598-021-99192-1
- 12 30. Loy DE, Plenderleith LJ, Sundararaman SA, Liu W, Gruszczyk J, Chen Y-J, et al. Evolutionary history of human  
13 *Plasmodium vivax* revealed by genome-wide analyses of related ape parasites. *Proc Natl Acad Sci USA*. 2018;115:  
14 E8450–E8459. doi:10.1073/pnas.1810053115
- 15 31. Yu JA, Oppler ZJ, Mitchell MW, Song YS, Brisson D. A fast machine-learning-guided primer design pipeline for  
16 selective whole genome amplification. *BioRxiv*. 2022. doi:10.1101/2022.04.27.489632
- 17 32. Gimblet C, Meisel JS, Loesche MA, Cole SD, Horwinski J, Novais FO, et al. Cutaneous Leishmaniasis Induces a  
18 Transmissible Dysbiotic Skin Microbiota that Promotes Skin Inflammation. *Cell Host Microbe*. 2017;22: 13-24.e4.  
19 doi:10.1016/j.chom.2017.06.006
- 20 33. Decuypere S, Rijal S, Yardley V, De Doncker S, Laurent T, Khanal B, et al. Gene expression analysis of the  
21 mechanism of natural Sb(V) resistance in *Leishmania donovani* isolates from Nepal. *Antimicrob Agents*  
22 *Chemother*. 2005;49: 4616–4621. doi:10.1128/AAC.49.11.4616-4621.2005
- 23 34. Torres DC, Adai V, Ribeiro-Alves M, Romero GAS, Arévalo J, Cupolillo E, et al. Targeted gene expression  
24 profiling in *Leishmania braziliensis* and *Leishmania guyanensis* parasites isolated from Brazilian patients with  
25 different antimonial treatment outcomes. *Infect Genet Evol*. 2010;10: 727–733. doi:10.1016/j.meegid.2010.05.006
- 26 35. Monte-Neto R, Laffitte M-CN, Leprohon P, Reis P, Frézard F, Ouellette M. Intrachromosomal amplification,  
27 locus deletion and point mutation in the aquaglyceroporin AQP1 gene in antimony resistant *Leishmania* (*Viannia*)  
28 *guyanensis*. *PLoS Negl Trop Dis*. 2015;9: e0003476. doi:10.1371/journal.pntd.0003476
- 29 36. Medina LS, Souza BA, Queiroz A, Guimarães LH, Lima Machado PR, M Carvalho E, et al. The gp63 Gene  
30 Cluster Is Highly Polymorphic in Natural *Leishmania* (*Viannia*) *braziliensis* Populations, but Functional Sites Are  
31 Conserved. *PLoS ONE*. 2016;11: e0163284. doi:10.1371/journal.pone.0163284
- 32 37. Rogers MB, Hilley JD, Dickens NJ, Wilkes J, Bates PA, Depledge DP, et al. Chromosome and gene copy number  
33 variation allow major structural change between species and strains of *Leishmania*. *Genome Res*. 2011;21: 2129–  
34 2142. doi:10.1101/gr.122945.111
- 35 38. Sterkers Y, Lachaud L, Bourgeois N, Crobu L, Bastien P, Pagès M. Novel insights into genome plasticity in  
36 Eukaryotes: mosaic aneuploidy in *Leishmania*. *Mol Microbiol*. 2012;86: 15–23. doi:10.1111/j.1365-  
37 2958.2012.08185.x
- 38 39. Dumetz F, Imamura H, Sanders M, Seblova V, Myskova J, Pescher P, et al. Modulation of Aneuploidy in  
39 *Leishmania donovani* during Adaptation to Different In Vitro and In Vivo Environments and Its Impact on Gene  
40 Expression. *MBio*. 2017;8. doi:10.1128/mBio.00599-17



- 1 40. Guimarães LH, Queiroz A, Silva JA, Silva SC, Magalhães V, Lago EL, et al. Atypical Manifestations of  
2 Cutaneous Leishmaniasis in a Region Endemic for *Leishmania braziliensis*: Clinical, Immunological and  
3 Parasitological Aspects. *PLoS Negl Trop Dis*. 2016;10: e0005100. doi:10.1371/journal.pntd.0005100
- 4 41. Queiroz A, Sousa R, Heine C, Cardoso M, Guimarães LH, Machado PRL, et al. Association between an emerging  
5 disseminated form of leishmaniasis and *Leishmania* (*Viannia*) *braziliensis* strain polymorphisms. *J Clin Microbiol*.  
6 2012;50: 4028–4034. doi:10.1128/JCM.02064-12
- 7 42. Lachaud L, Bourgeois N, Kuk N, Morelle C, Crobu L, Merlin G, et al. Constitutive mosaic aneuploidy is a unique  
8 genetic feature widespread in the *Leishmania* genus. *Microbes Infect*. 2014;16: 61–66.  
9 doi:10.1016/j.micinf.2013.09.005
- 10 43. Negreira GH, Monsieurs P, Imamura H, Maes I, Kuk N, Yagoubat A, et al. High throughput single-cell genome  
11 sequencing gives insights into the generation and evolution of mosaic aneuploidy in *Leishmania donovani*. *Nucleic*  
12 *Acids Res*. 2022;50: 293–305. doi:10.1093/nar/gkab1203
- 13 44. Briggs EM, Marques CA, Reis-Cunha J, Black J, Campbell S, Damasceno J, et al. Next-Generation Analysis of  
14 Trypanosomatid Genome Stability and Instability. *Methods Mol Biol*. 2020;2116: 225–262. doi:10.1007/978-1-  
15 0716-0294-2\_15
- 16 45. Weirather JL, Jeronimo SMB, Gautam S, Sundar S, Kang M, Kurtz MA, et al. Serial quantitative PCR assay for  
17 detection, species discrimination, and quantification of *Leishmania* spp. in human samples. *J Clin Microbiol*.  
18 2011;49: 3892–3904. doi:10.1128/JCM.r00764-11
- 19 46. Alves-Ferreira EVC, Toledo JS, De Oliveira AHC, Ferreira TR, Ruy PC, Pinzan CF, et al. Differential Gene  
20 Expression and Infection Profiles of Cutaneous and Mucosal *Leishmania braziliensis* Isolates from the Same  
21 Patient. *PLoS Negl Trop Dis*. 2015;9: e0004018. doi:10.1371/journal.pntd.0004018
- 22 47. Van den Broeck F, Savill NJ, Imamura H, Sanders M, Maes I, Cooper S, et al. Ecological divergence and  
23 hybridization of Neotropical *Leishmania* parasites. *Proc Natl Acad Sci USA*. 2020;117: 25159–25168.  
24 doi:10.1073/pnas.1920136117
- 25 48. Machado PR, Ampuero J, Guimarães LH, Villasboas L, Rocha AT, Schriefer A, et al. Miltefosine in the treatment  
26 of cutaneous leishmaniasis caused by *Leishmania braziliensis* in Brazil: a randomized and controlled trial. *PLoS*  
27 *Negl Trop Dis*. 2010;4: e912. doi:10.1371/journal.pntd.0000912
- 28 49. Cuypers B, Dumetz F, Meysman P, Laukens K, De Muylder G, Dujardin JC, et al. The absence of C-5 DNA  
29 methylation in *Leishmania donovani* allows DNA enrichment from complex samples. *BioRxiv*. 2019.  
30 doi:10.1101/747063
- 31 50. Cuypers B, Dumetz F, Meysman P, Laukens K, De Muylder G, Dujardin J-C, et al. The Absence of C-5 DNA  
32 Methylation in *Leishmania donovani* Allows DNA Enrichment from Complex Samples. *Microorganisms*. 2020;8.  
33 doi:10.3390/microorganisms8081252
- 34 51. Unger A, O’Neal S, Machado PRL, Guimarães LH, Morgan DJ, Schriefer A, et al. Association of treatment of  
35 American cutaneous leishmaniasis prior to ulcer development with high rate of failure in northeastern Brazil. *Am J*  
36 *Trop Med Hyg*. 2009;80: 574–579. doi:10.4269/ajtmh.2009.80.574
- 37 52. Karamysheva ZN, Gutierrez Guarnizo SA, Karamyshev AL. Regulation of translation in the protozoan parasite  
38 leishmania. *Int J Mol Sci*. 2020;21. doi:10.3390/ijms21082981
- 39 53. De Pablos LM, Ferreira TR, Walrad PB. Developmental differentiation in *Leishmania* lifecycle progression: post-  
40 transcriptional control conducts the orchestra. *Curr Opin Microbiol*. 2016;34: 82–89.  
41 doi:10.1016/j.mib.2016.08.004

- 1 54. Wurst M, Seliger B, Jha BA, Klein C, Queiroz R, Clayton C. Expression of the RNA recognition motif protein  
2 RBP10 promotes a bloodstream-form transcript pattern in *Trypanosoma brucei*. *Mol Microbiol.* 2012;83: 1048–  
3 1063. doi:10.1111/j.1365-2958.2012.07988.x
- 4 55. Kolev NG, Ramey-Butler K, Cross GAM, Ullu E, Tschudi C. Developmental progression to infectivity in  
5 *Trypanosoma brucei* triggered by an RNA-binding protein. *Science.* 2012;338: 1352–1353.  
6 doi:10.1126/science.1229641
- 7 56. Späth GF, Beverley SM. A lipophosphoglycan-independent method for isolation of infective *Leishmania*  
8 metacyclic promastigotes by density gradient centrifugation. *Exp Parasitol.* 2001;99: 97–103.  
9 doi:10.1006/expr.2001.4656
- 10 57. Wingett SW, Andrews S. FastQ Screen: A tool for multi-genome mapping and quality control. [version 2; peer  
11 review: 4 approved]. *F1000Res.* 2018;7: 1338. doi:10.12688/f1000research.15931.2
- 12 58. Gaio D, Anantanawat K, To J, Liu M, Monahan L, Darling AE. Hackflex: low-cost, high-throughput, Illumina  
13 Nextera Flex library construction. *Microb Genom.* 2022;8. doi:10.1099/mgen.0.000744
- 14 59. Bolger AM, Lohse M, Usadel B. Trimmomatic: a flexible trimmer for Illumina sequence data. *Bioinformatics.*  
15 2014;30: 2114–2120. doi:10.1093/bioinformatics/btu170
- 16 60. Langmead B, Salzberg SL. Fast gapped-read alignment with Bowtie 2. *Nat Methods.* 2012;9: 357–359.  
17 doi:10.1038/nmeth.1923
- 18 61. Ewels P, Magnusson M, Lundin S, Käller M. MultiQC: summarize analysis results for multiple tools and samples  
19 in a single report. *Bioinformatics.* 2016;32: 3047–3048. doi:10.1093/bioinformatics/btw354
- 20 62. Li H, Durbin R. Fast and accurate short read alignment with Burrows-Wheeler transform. *Bioinformatics.*  
21 2009;25: 1754–1760. doi:10.1093/bioinformatics/btp324
- 22 63. Li H, Handsaker B, Wysoker A, Fennell T, Ruan J, Homer N, et al. The Sequence Alignment/Map format and  
23 SAMtools. *Bioinformatics.* 2009;25: 2078–2079. doi:10.1093/bioinformatics/btp352
- 24 64. broadinstitute/picard: A set of command line tools (in Java) for manipulating high-throughput sequencing (HTS)  
25 data and formats such as SAM/BAM/CRAM and VCF. [cited 21 Aug 2022]. Available:  
26 <https://github.com/broadinstitute/picard>
- 27 65. Grace CA, Forrester S, Silva VC, Carvalho KSS, Kilford H, Chew YP, et al. Candidates for Balancing Selection in  
28 *Leishmania donovani* Complex Parasites. *Genome Biol Evol.* 2021;13. doi:10.1093/gbe/evab265
- 29 66. Quinlan AR, Hall IM. BEDTools: a flexible suite of utilities for comparing genomic features. *Bioinformatics.*  
30 2010;26: 841–842. doi:10.1093/bioinformatics/btq033
- 31 67. DePristo MA, Banks E, Poplin R, Garimella KV, Maguire JR, Hartl C, et al. A framework for variation discovery  
32 and genotyping using next-generation DNA sequencing data. *Nat Genet.* 2011;43: 491–498. doi:10.1038/ng.806
- 33 68. Garrison E, Marth G. Haplotype-based variant detection from short-read sequencing. *arXiv.* 2012.
- 34 69. Danecek P, Bonfield JK, Liddle J, Marshall J, Ohan V, Pollard MO, et al. Twelve years of SAMtools and  
35 BCFtools. *Gigascience.* 2021;10. doi:10.1093/gigascience/giab008
- 36 70. Danecek P, Auton A, Abecasis G, Albers CA, Banks E, DePristo MA, et al. The variant call format and VCFtools.  
37 *Bioinformatics.* 2011;27: 2156–2158. doi:10.1093/bioinformatics/btr330

- 1 71. Purcell S, Neale B, Todd-Brown K, Thomas L, Ferreira MAR, Bender D, et al. PLINK: a tool set for whole-  
2 genome association and population-based linkage analyses. *Am J Hum Genet.* 2007;81: 559–575.  
3 doi:10.1086/519795
- 4 72. Ortiz EM. vcf2phyliip v2.0: convert a VCF matrix into several matrix formats for phylogenetic analysis. Zenodo.  
5 2019. doi:10.5281/zenodo.2540861
- 6 73. Nguyen L-T, Schmidt HA, von Haeseler A, Minh BQ. IQ-TREE: a fast and effective stochastic algorithm for  
7 estimating maximum-likelihood phylogenies. *Mol Biol Evol.* 2015;32: 268–274. doi:10.1093/molbev/msu300
- 8 74. Argimón S, Abudahab K, Goater RJE, Fedosejev A, Bhai J, Glasner C, et al. Microreact: visualizing and sharing  
9 data for genomic epidemiology and phylogeography. *Microb Genom.* 2016;2: e000093.  
10 doi:10.1099/mgen.0.000093
- 11 75. Cingolani P, Platts A, Wang LL, Coon M, Nguyen T, Wang L, et al. A program for annotating and predicting the  
12 effects of single nucleotide polymorphisms, SnpEff: SNPs in the genome of *Drosophila melanogaster* strain  
13 w1118; iso-2; iso-3. *Fly (Austin).* 2012;6: 80–92. doi:10.4161/fly.19695
- 14 76. Amos B, Aurrecochea C, Barba M, Barreto A, Basenko EY, Bazant W, et al. VEuPathDB: the eukaryotic  
15 pathogen, vector and host bioinformatics resource center. *Nucleic Acids Res.* 2022;50: D898–D911.  
16 doi:10.1093/nar/gkab929
- 17 77. Aslett M, Aurrecochea C, Berriman M, Brestelli J, Brunk BP, Carrington M, et al. TriTrypDB: a functional  
18 genomic resource for the Trypanosomatidae. *Nucleic Acids Res.* 2010;38: D457–62. doi:10.1093/nar/gkp851
- 19 78. Cingolani P, Patel VM, Coon M, Nguyen T, Land SJ, Ruden DM, et al. Using *Drosophila melanogaster* as a  
20 Model for Genotoxic Chemical Mutational Studies with a New Program, SnpSift. *Front Genet.* 2012;3: 35.  
21 doi:10.3389/fgene.2012.00035
- 22 79. R Core Team. R: A language and environment for statistical computing. Vienna, Austria: R Foundation for  
23 Statistical Computing; 2018.
- 24 80. Huber W, Carey VJ, Gentleman R, Anders S, Carlson M, Carvalho BS, et al. Orchestrating high-throughput  
25 genomic analysis with Bioconductor. *Nat Methods.* 2015;12: 115–121. doi:10.1038/nmeth.3252
- 26 81. Knaus BJ, Grünwald NJ. vcfr: a package to manipulate and visualize variant call format data in R. *Mol Ecol*  
27 *Resour.* 2017;17: 44–53. doi:10.1111/1755-0998.12549
- 28 82. Wickham H. *ggplot2: Elegant Graphics for Data Analysis.* New York: Springer, c2009.: Springer; 2009.

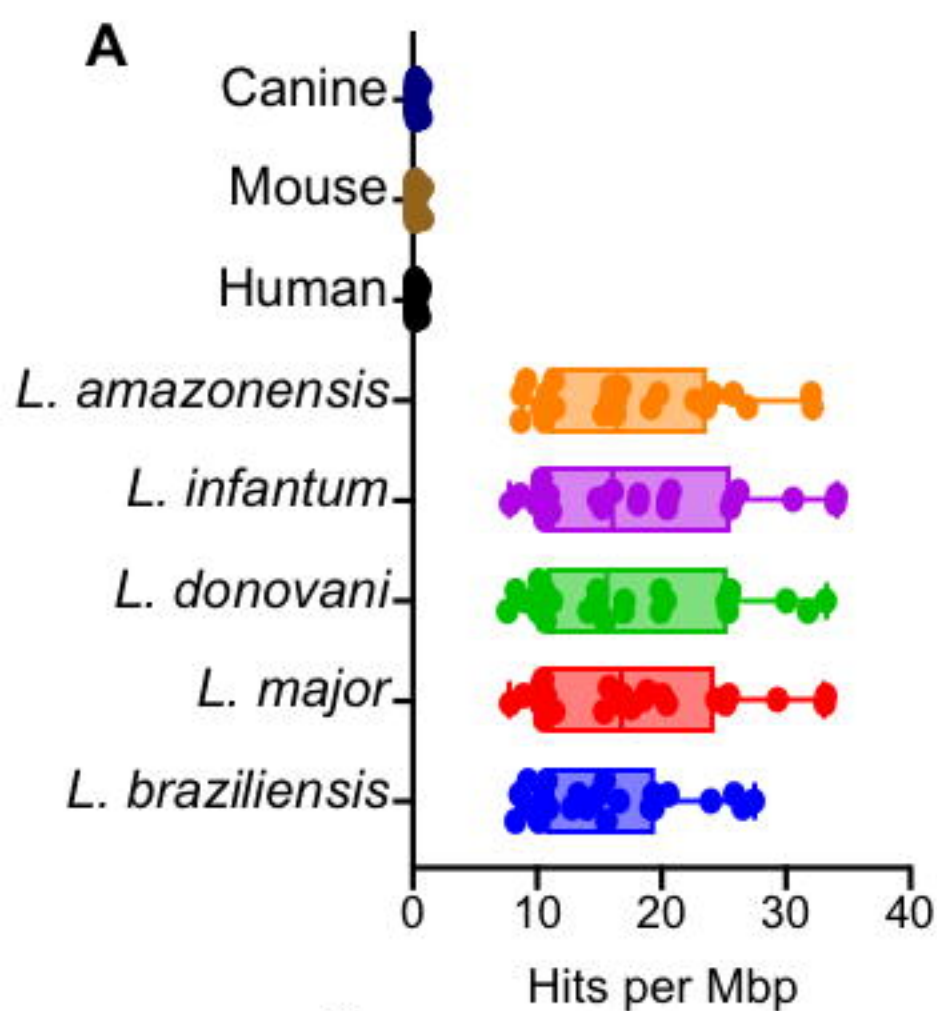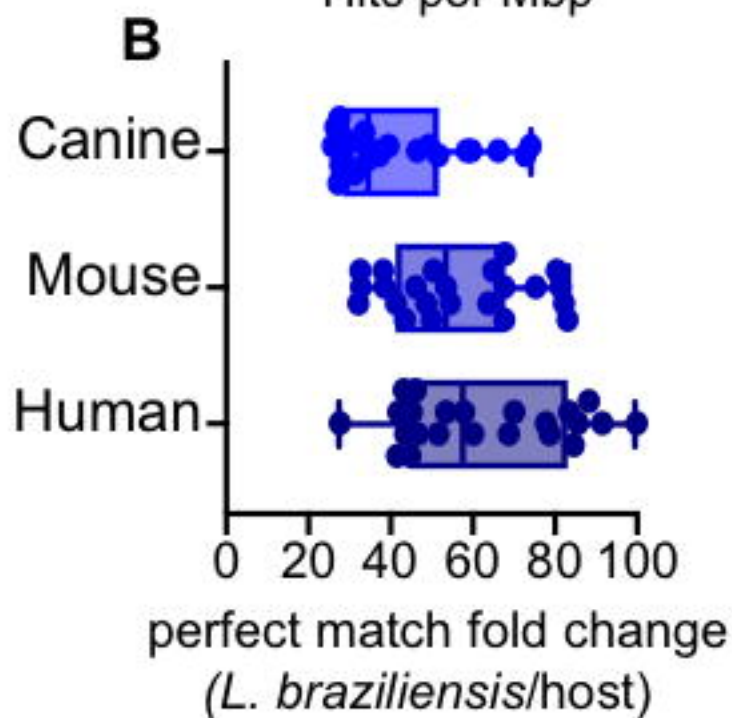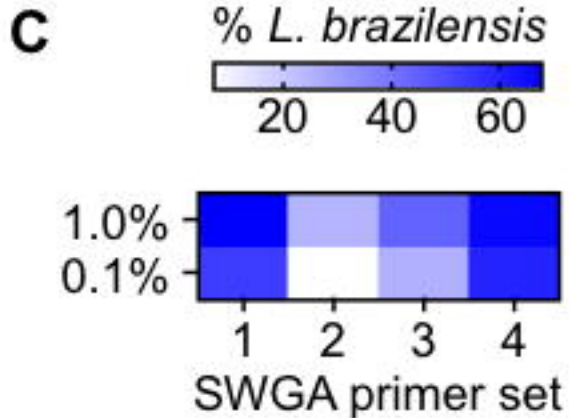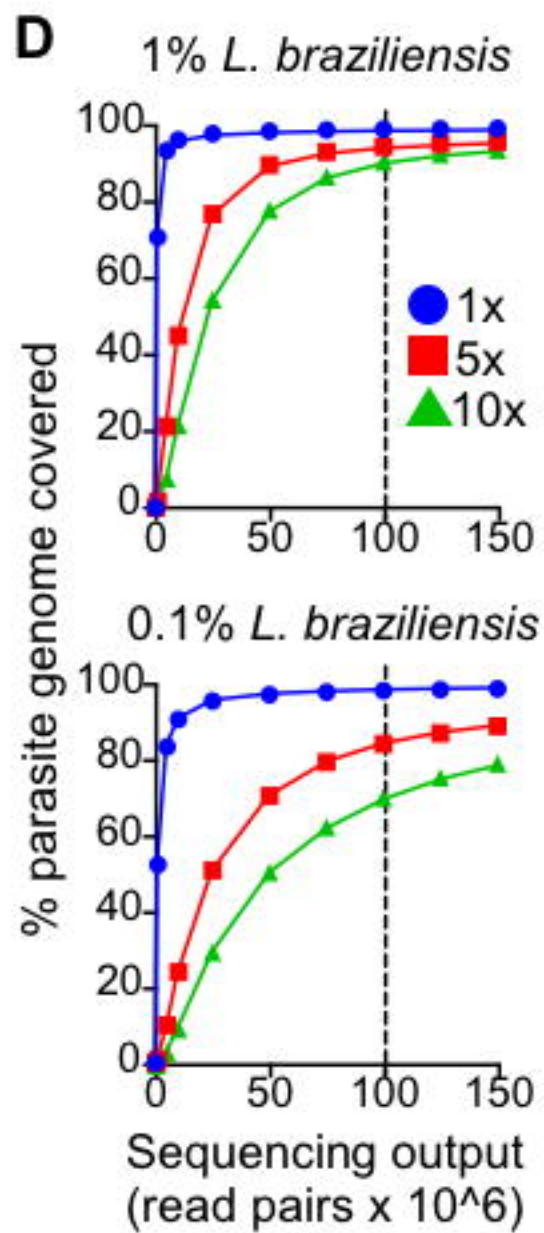

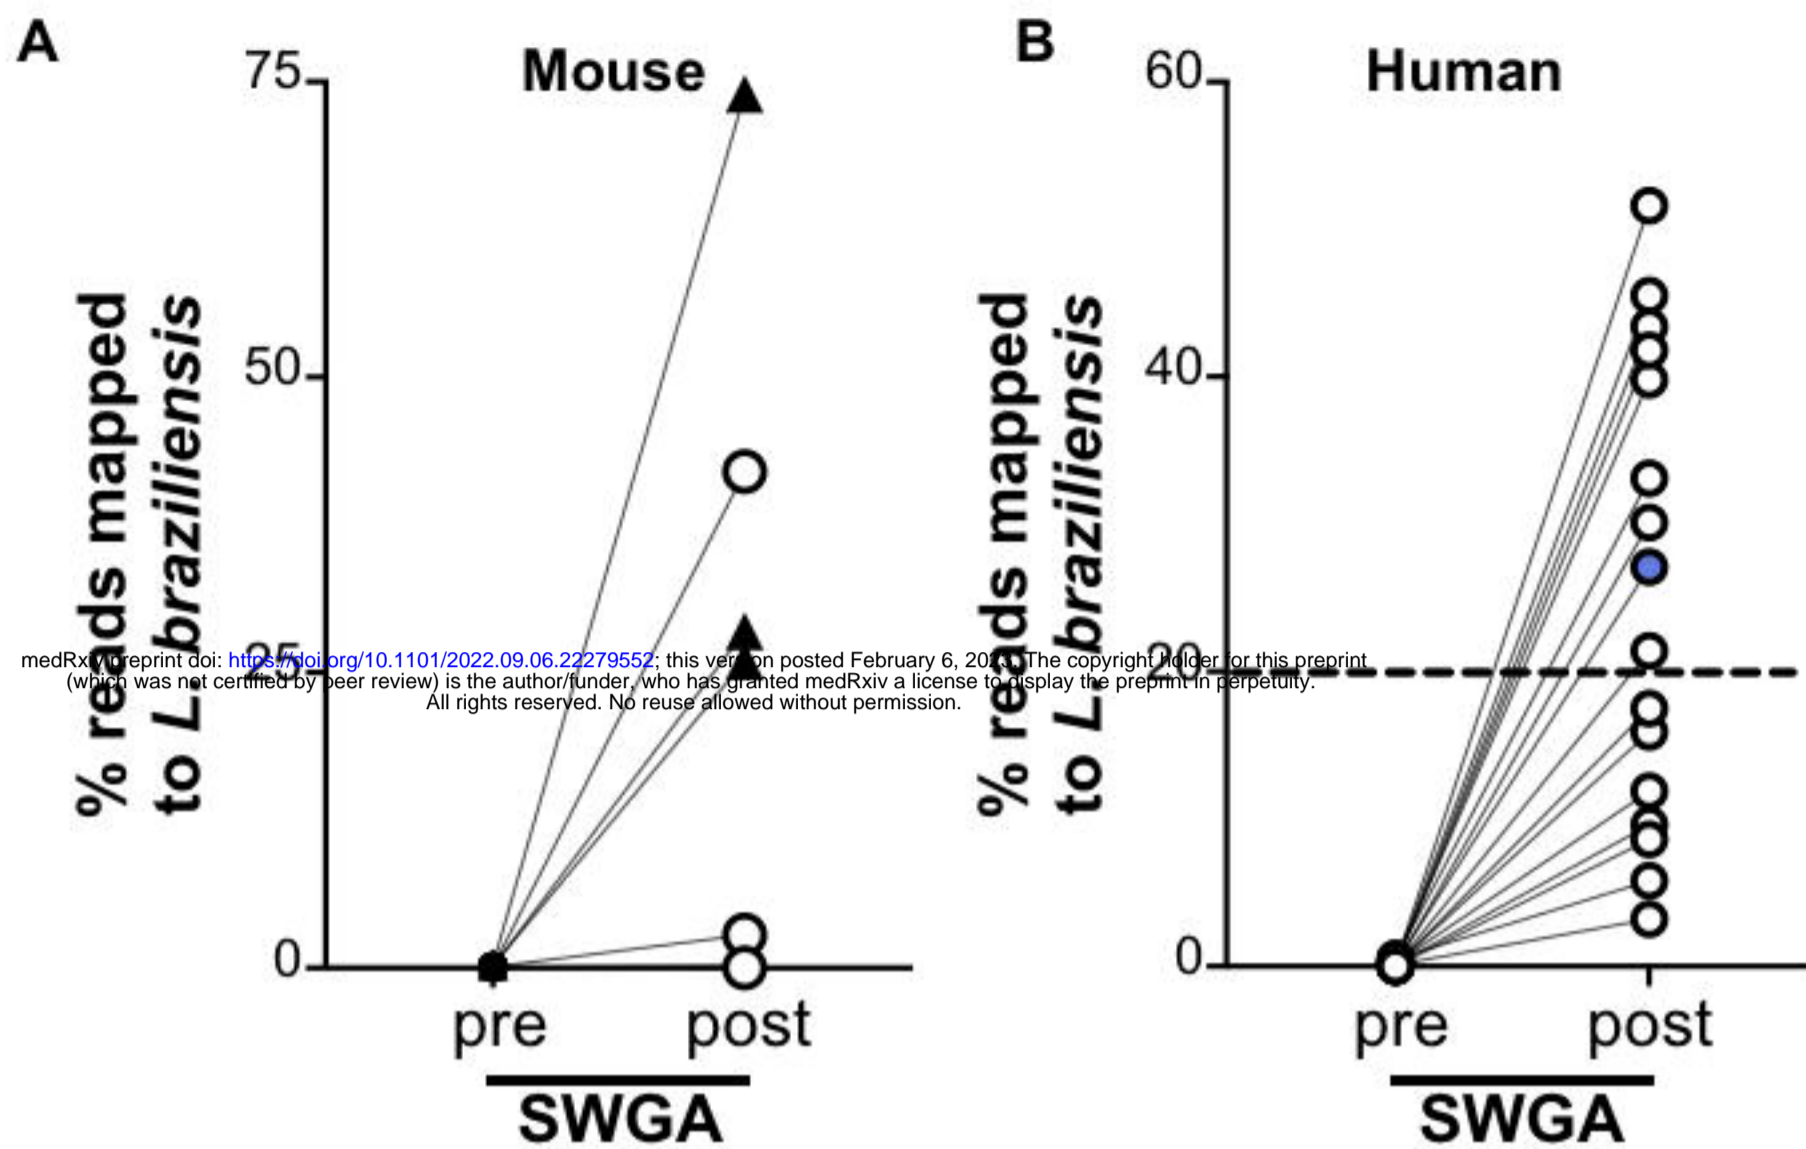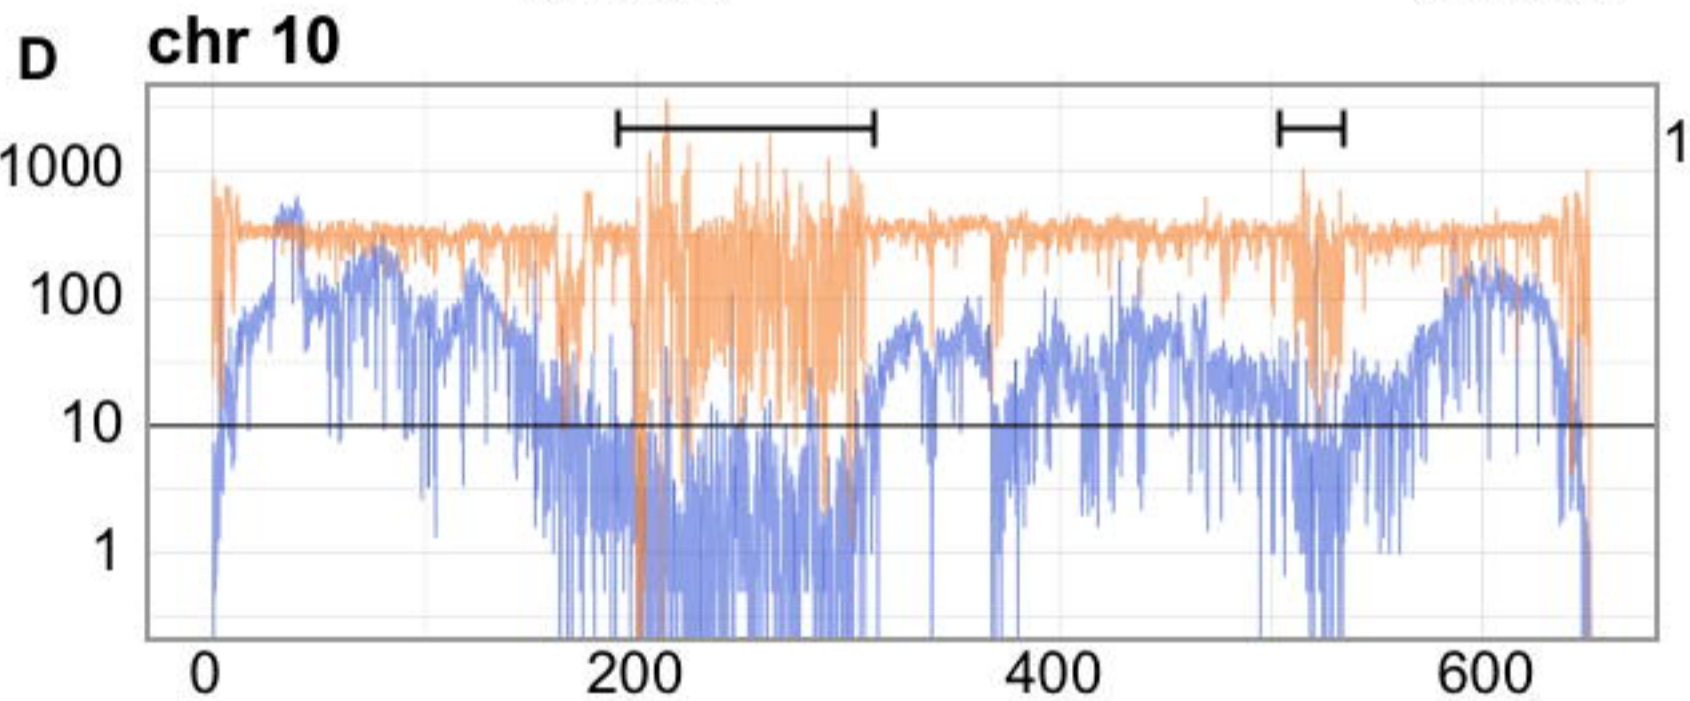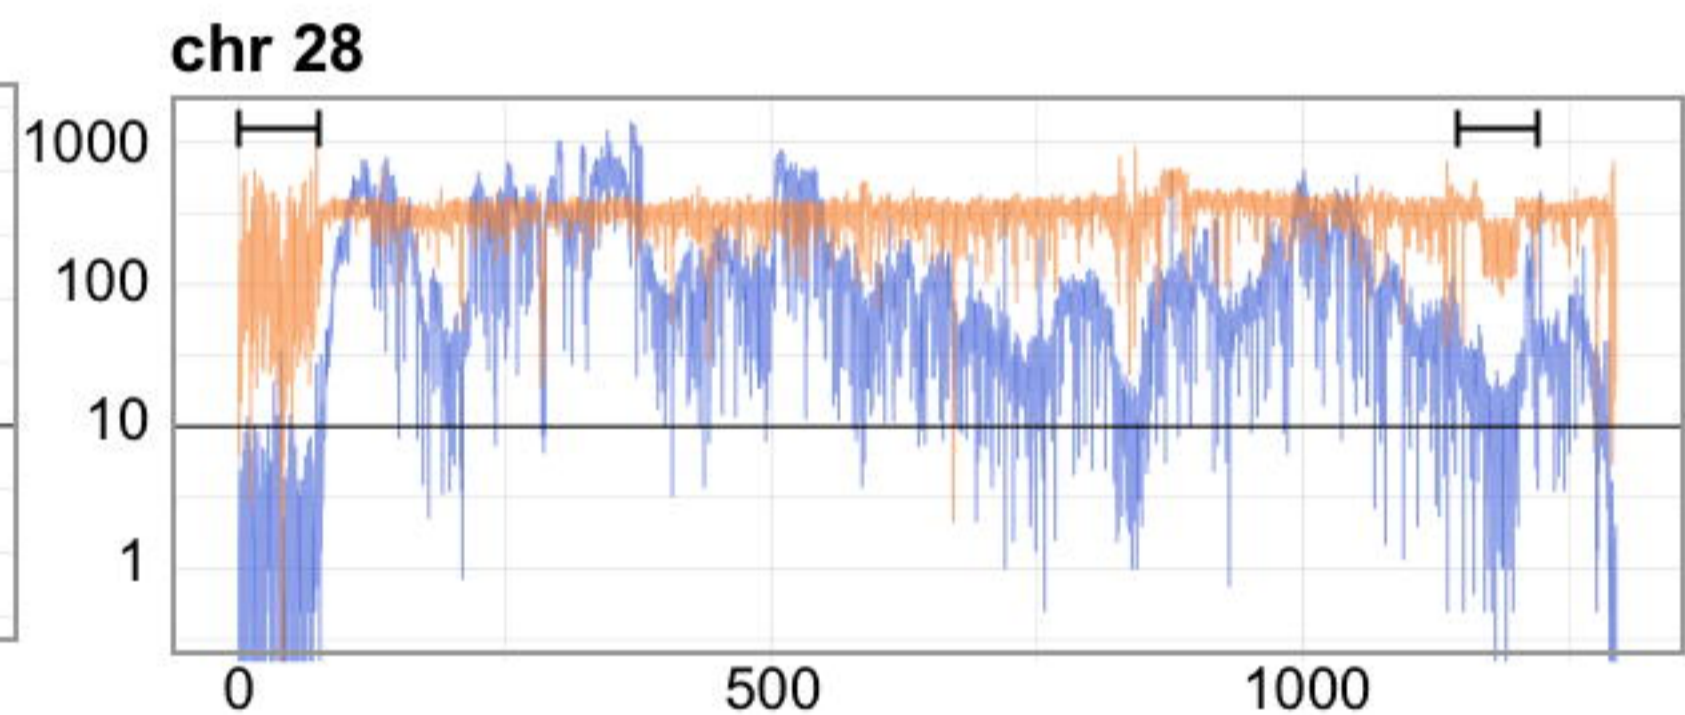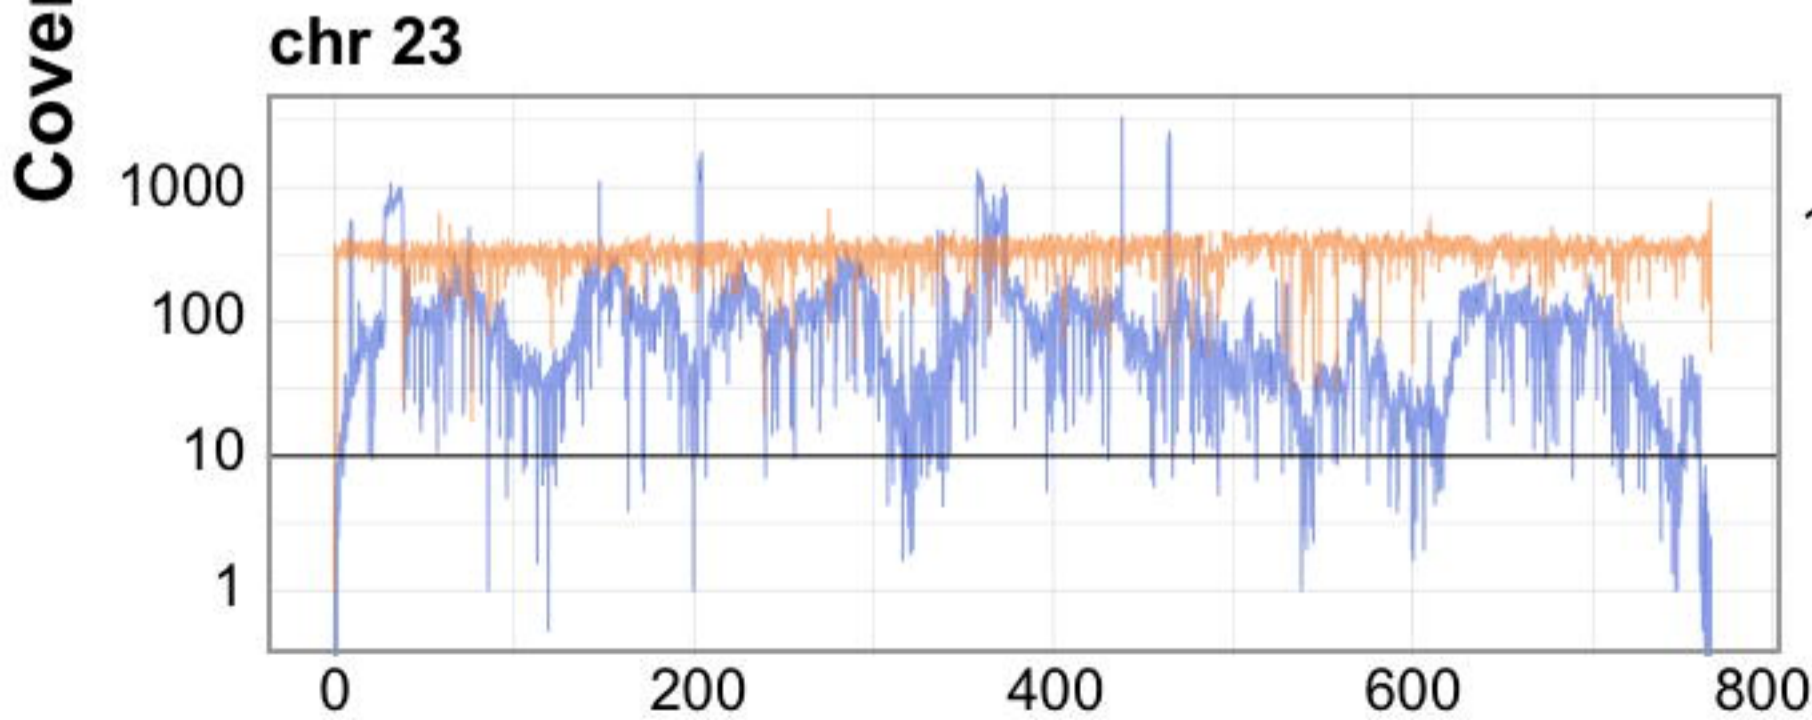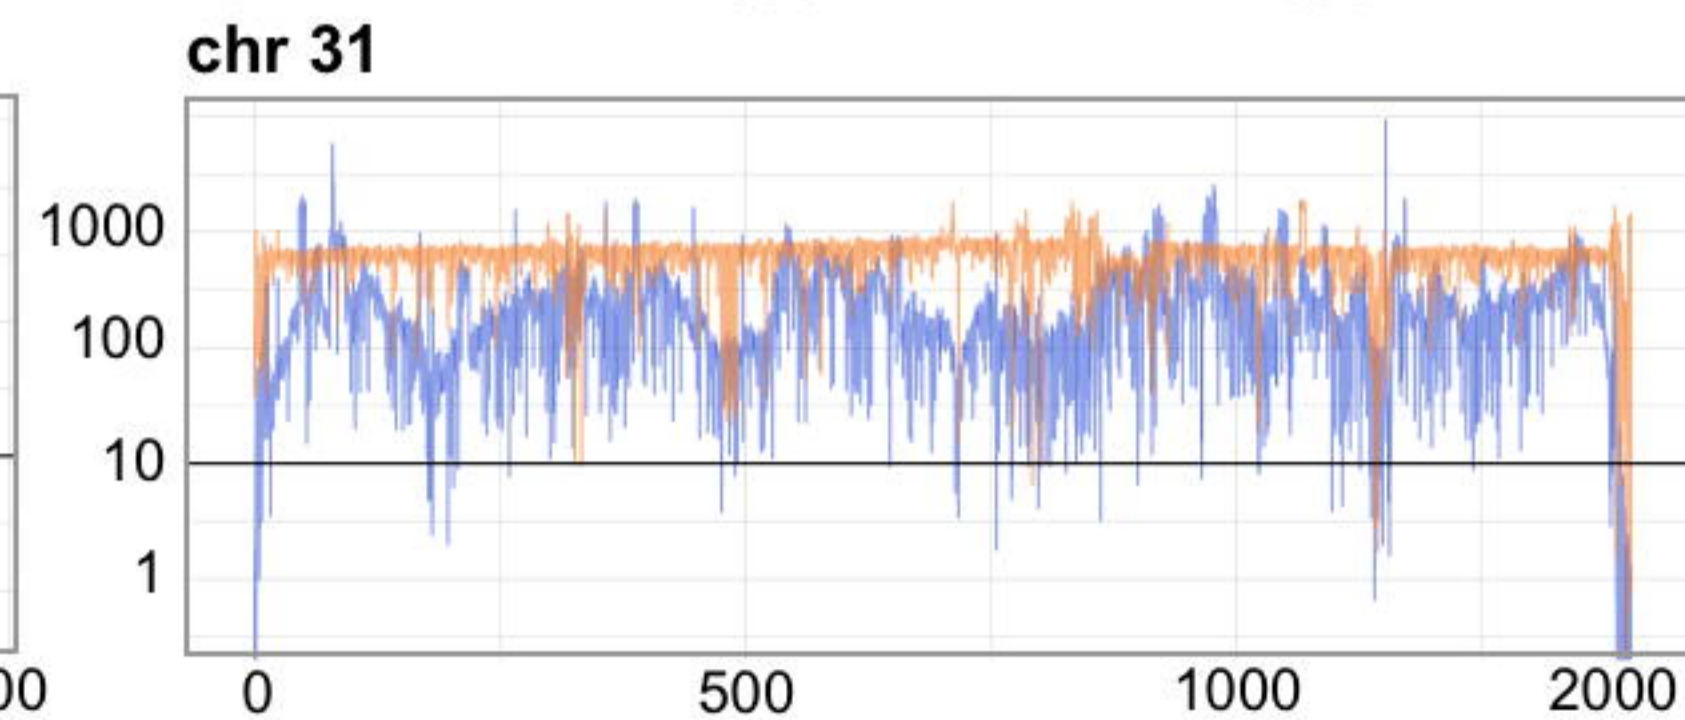

**Chromosome position (kb)**

medRxiv preprint doi: <https://doi.org/10.1101/2022.09.06.22279552>; this version posted February 6, 2023. The copyright holder for this preprint (which was not certified by peer review) is the author/funder, who has granted medRxiv a license to display the preprint in perpetuity. All rights reserved. No reuse allowed without permission.

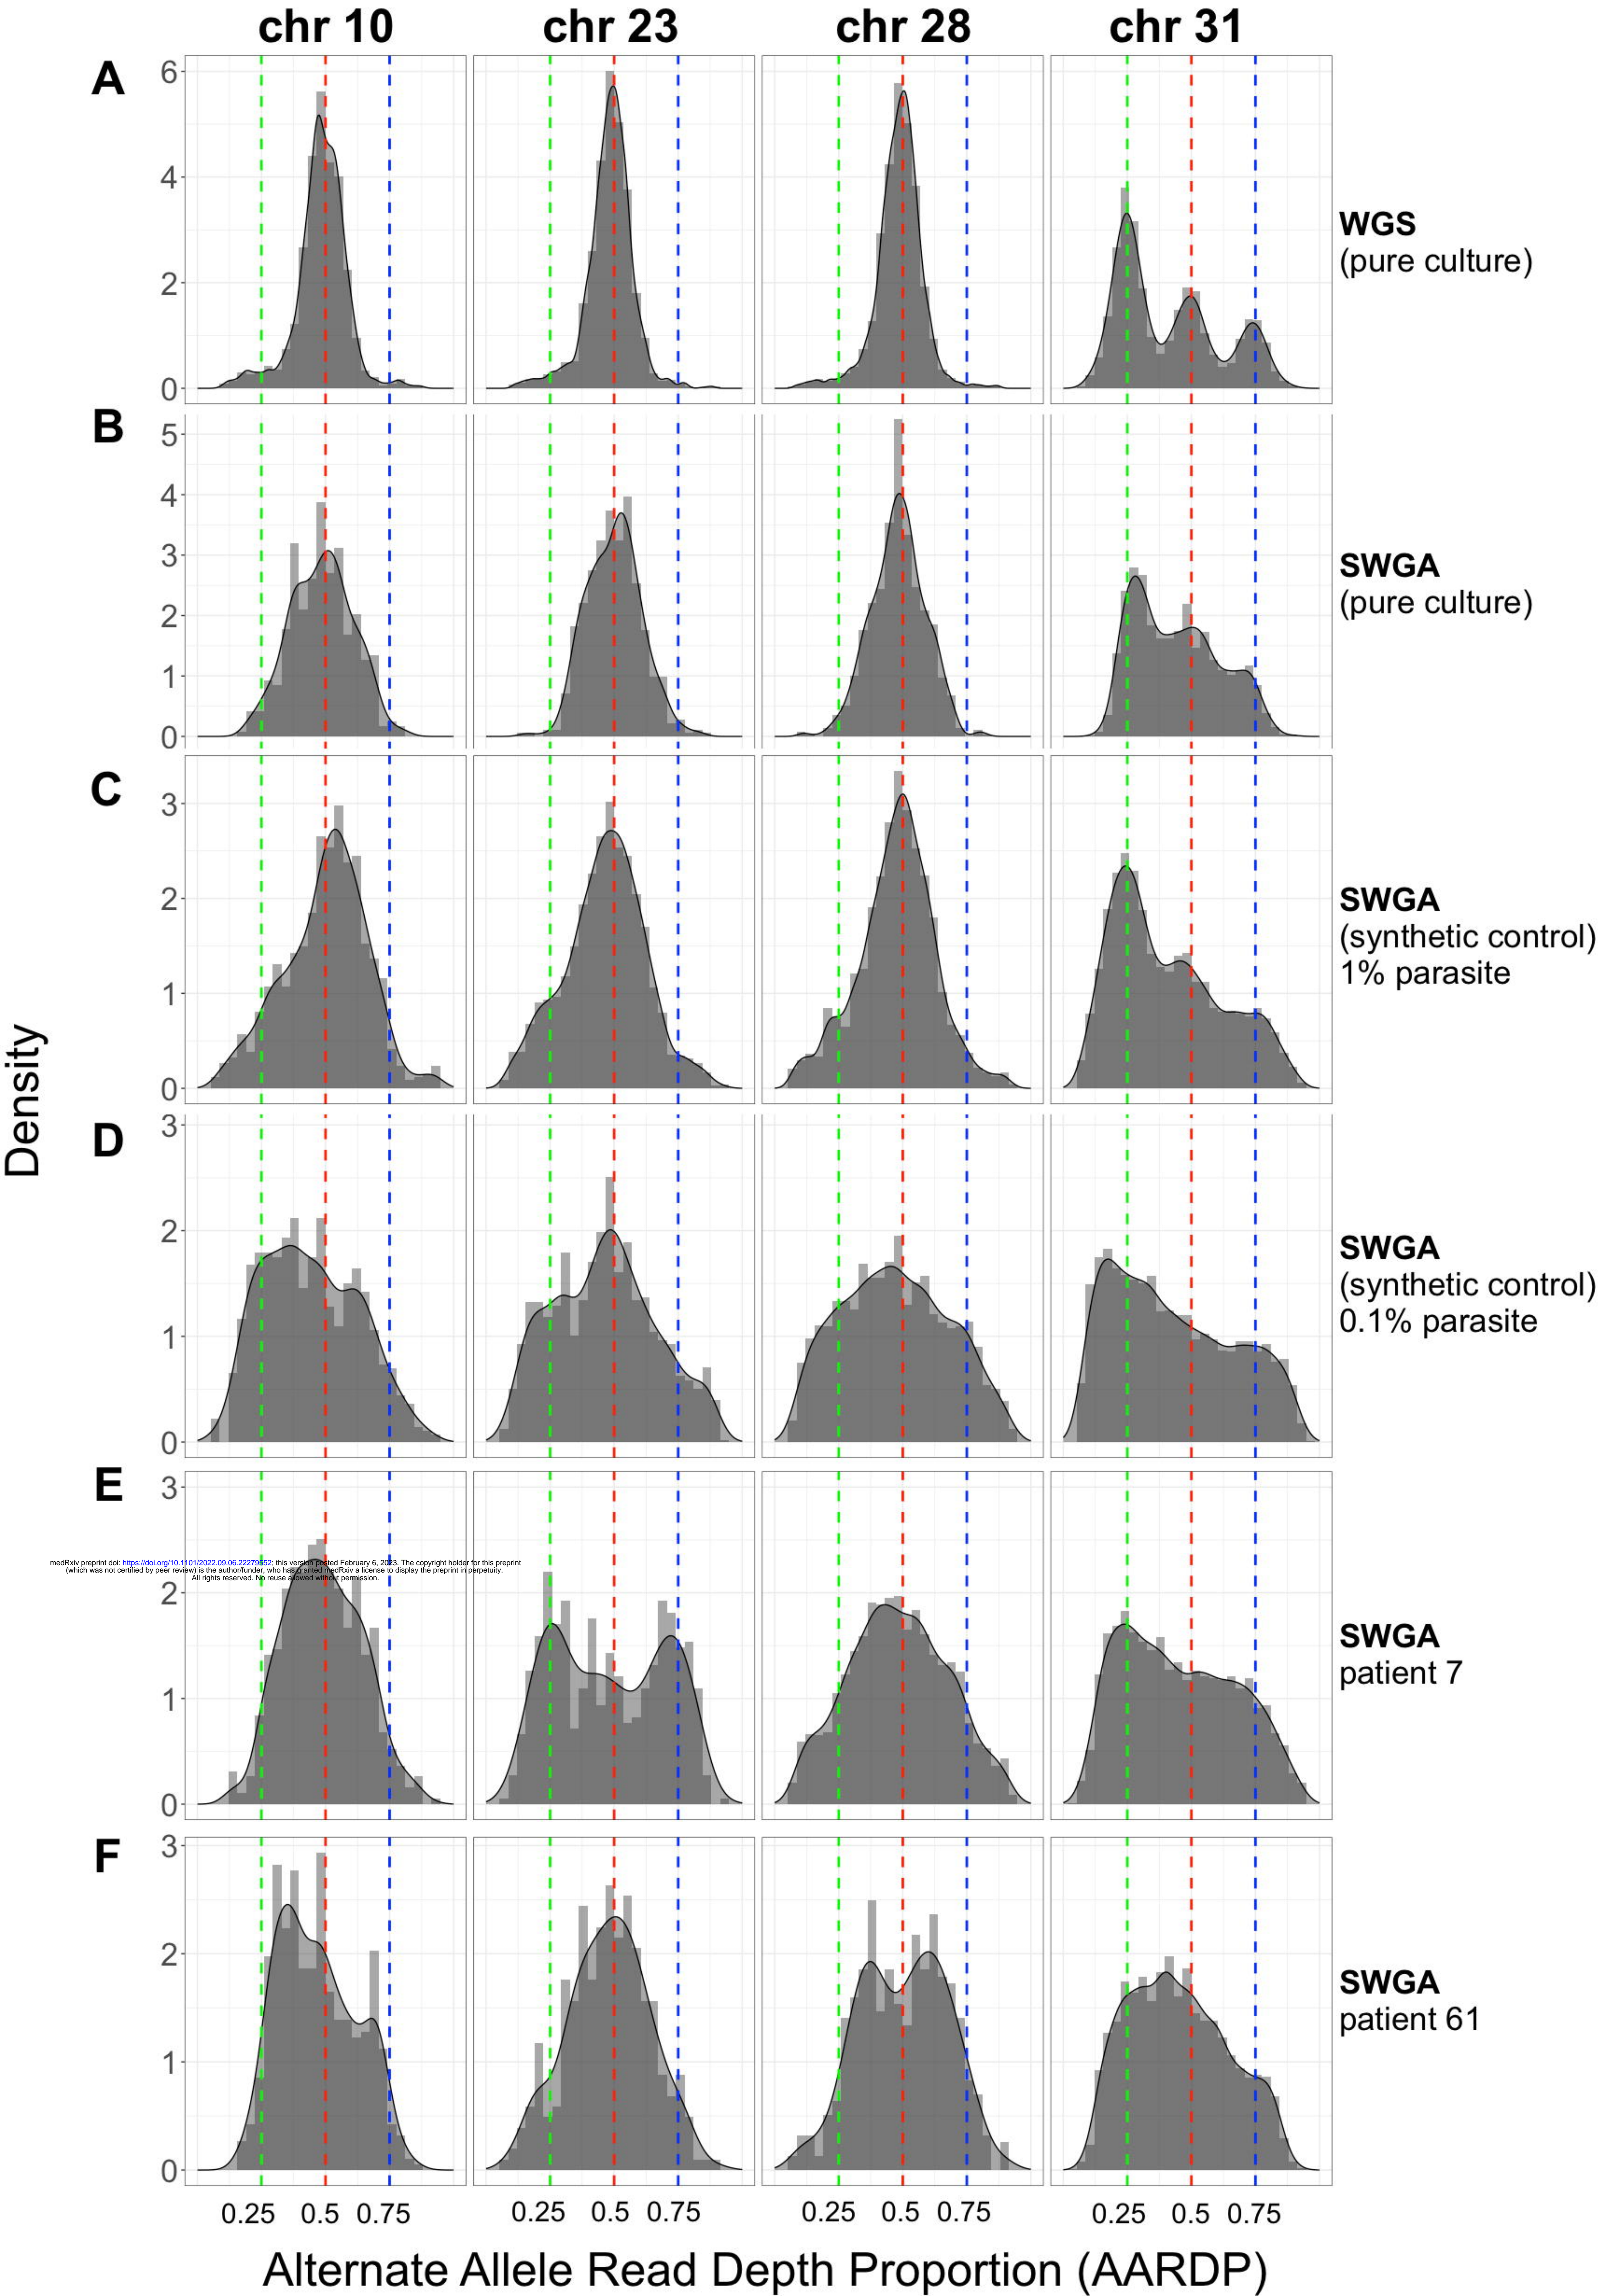

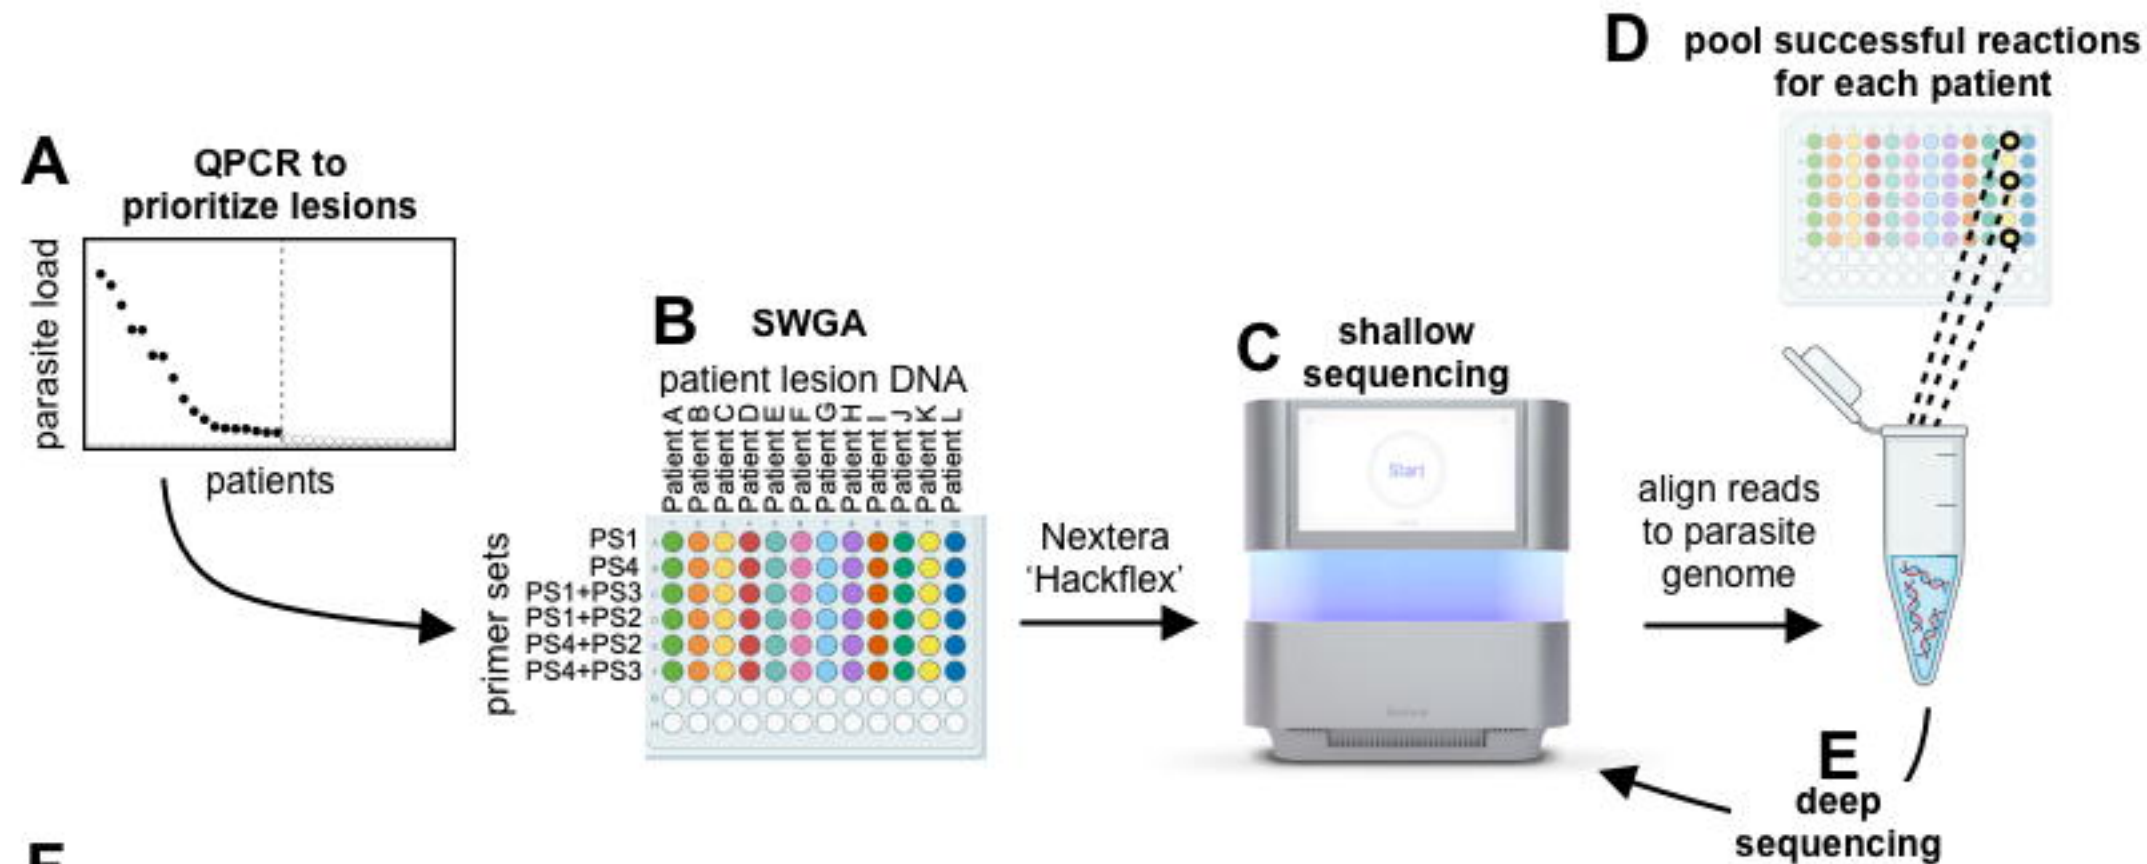

| Patient ID           | Total # of reads (millions) | Reads mapping to <i>L. braziliensis</i> (millions) | Breadth of coverage at 10x (%) | Number of SNPs        | Number of INDELS      | Mean genome coverage | Municipality              |
|----------------------|-----------------------------|----------------------------------------------------|--------------------------------|-----------------------|-----------------------|----------------------|---------------------------|
| 7                    | 121.79                      | 52.67                                              | 89.8                           | 91947                 | 18063                 | 48                   | Teolandia                 |
| 8                    | 143.73                      | 52.26                                              | 89.8                           | 86158                 | 17742                 | 58                   | Teolandia                 |
| 9                    | 96.58                       | 46.66                                              | 78.9                           | 76775                 | 15884                 | 27                   | Teolandia                 |
| 11                   | 112.83                      | 65.41                                              | 86.8                           | 82875                 | 17852                 | 36                   | Wenceslau Guimarães       |
| 13                   | 87.06                       | 49.94                                              | 82.6                           | 81576                 | 16761                 | 34                   | Presidente Tancredo Neves |
| 15                   | 101.86                      | 49.47                                              | 84.4                           | 80523                 | 17418                 | 38                   | Presidente Tancredo Neves |
| 17                   | 198.61                      | 29.36                                              | 89.1                           | 89145                 | 19842                 | 31                   | Nilo Peçanha              |
| 21                   | 92.05                       | 32.46                                              | 87.5                           | 90188                 | 18446                 | 39                   | Valença                   |
| 24                   | 176.78                      | 40.84                                              | 88.1                           | 84495                 | 20746                 | 38                   | Wenceslau Guimarães       |
| 31                   | 66.34                       | 45.50                                              | 88.7                           | 86391                 | 17832                 | 42                   | Teolandia                 |
| 36                   | 47.91                       | 25.80                                              | 82.4                           | 83444                 | 17093                 | 32                   | Nilo Peçanha              |
| 39                   | 143.65                      | 69.89                                              | 80.8                           | 78018                 | 18244                 | 27                   | Wenceslau Guimarães       |
| 40                   | 151.37                      | 57.36                                              | 77.3                           | 73011                 | 16134                 | 26                   | Teolandia                 |
| 56                   | 122.04                      | 49.61                                              | 87.6                           | 85569                 | 20017                 | 42                   | Ubaira                    |
| 58                   | 93.00                       | 49.44                                              | 86.0                           | 85759                 | 17862                 | 39                   | Valença                   |
| 61                   | 95.96                       | 24.31                                              | 86.7                           | 91811                 | 18743                 | 38                   | Wenceslau Guimarães       |
| 64                   | 95.10                       | 42.91                                              | 86.5                           | 90288                 | 17969                 | 38                   | Taperoá                   |
| 66                   | 123.36                      | 66.22                                              | 69.8                           | 74259                 | 14773                 | 18                   | Wenceslau Guimarães       |
| <b>Median (± SD)</b> | <b>107.35 (± 37.48)</b>     | <b>49.46 (± 13.22)</b>                             | <b>86.60 (± 5.22)</b>          | <b>85032 (± 5779)</b> | <b>17857 (± 1468)</b> | <b>38 (± 9)</b>      |                           |

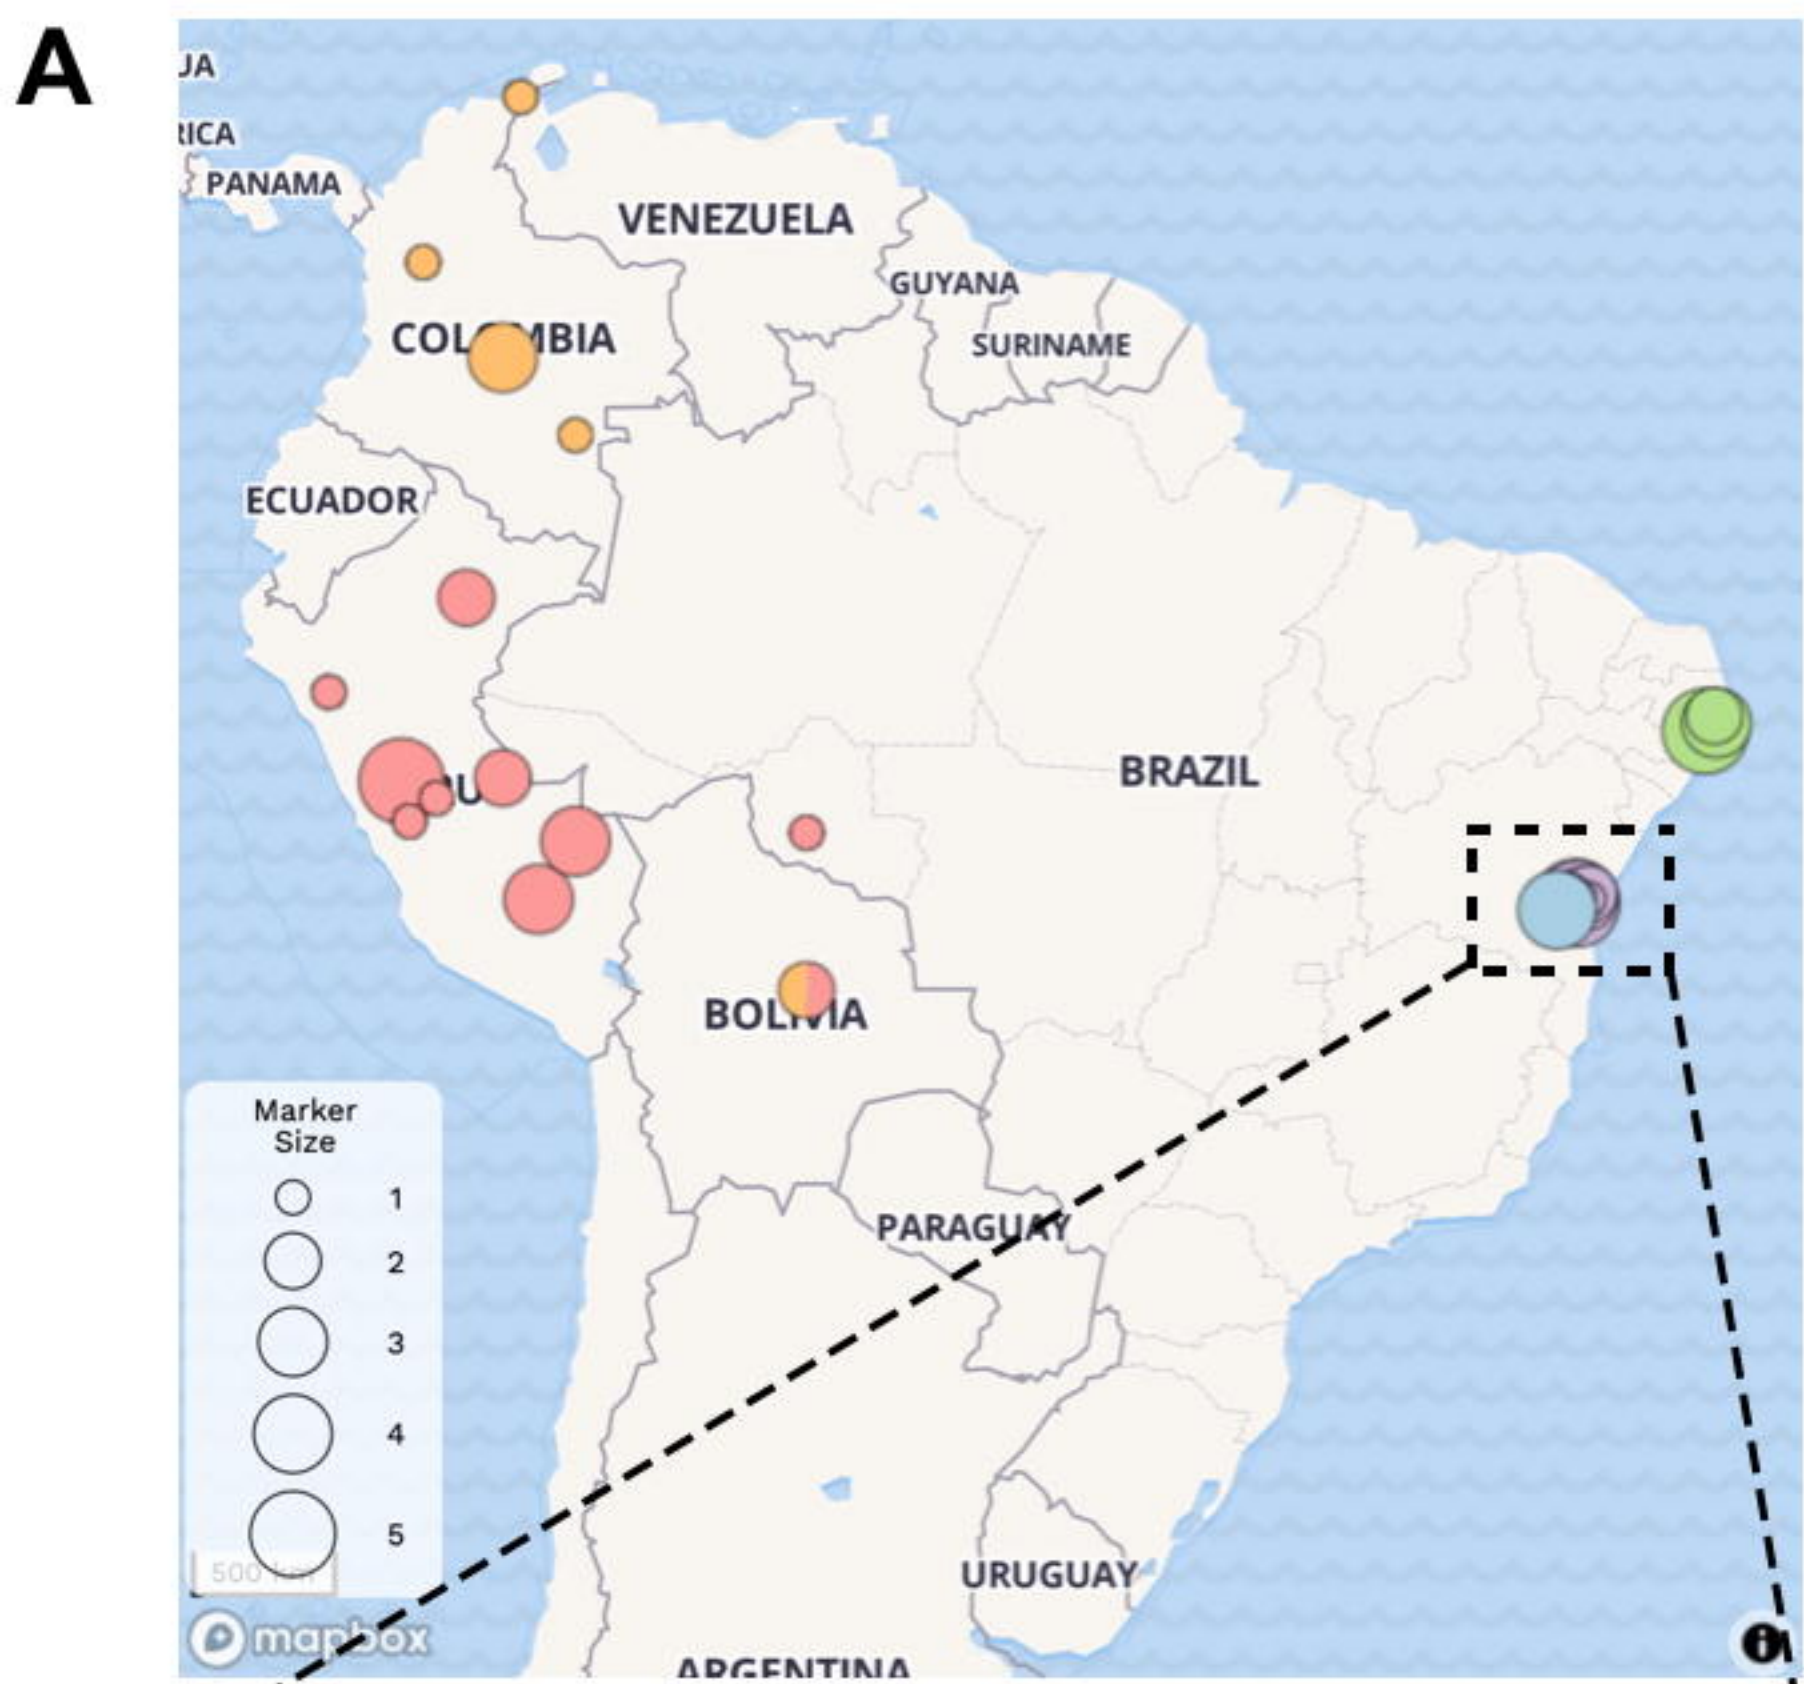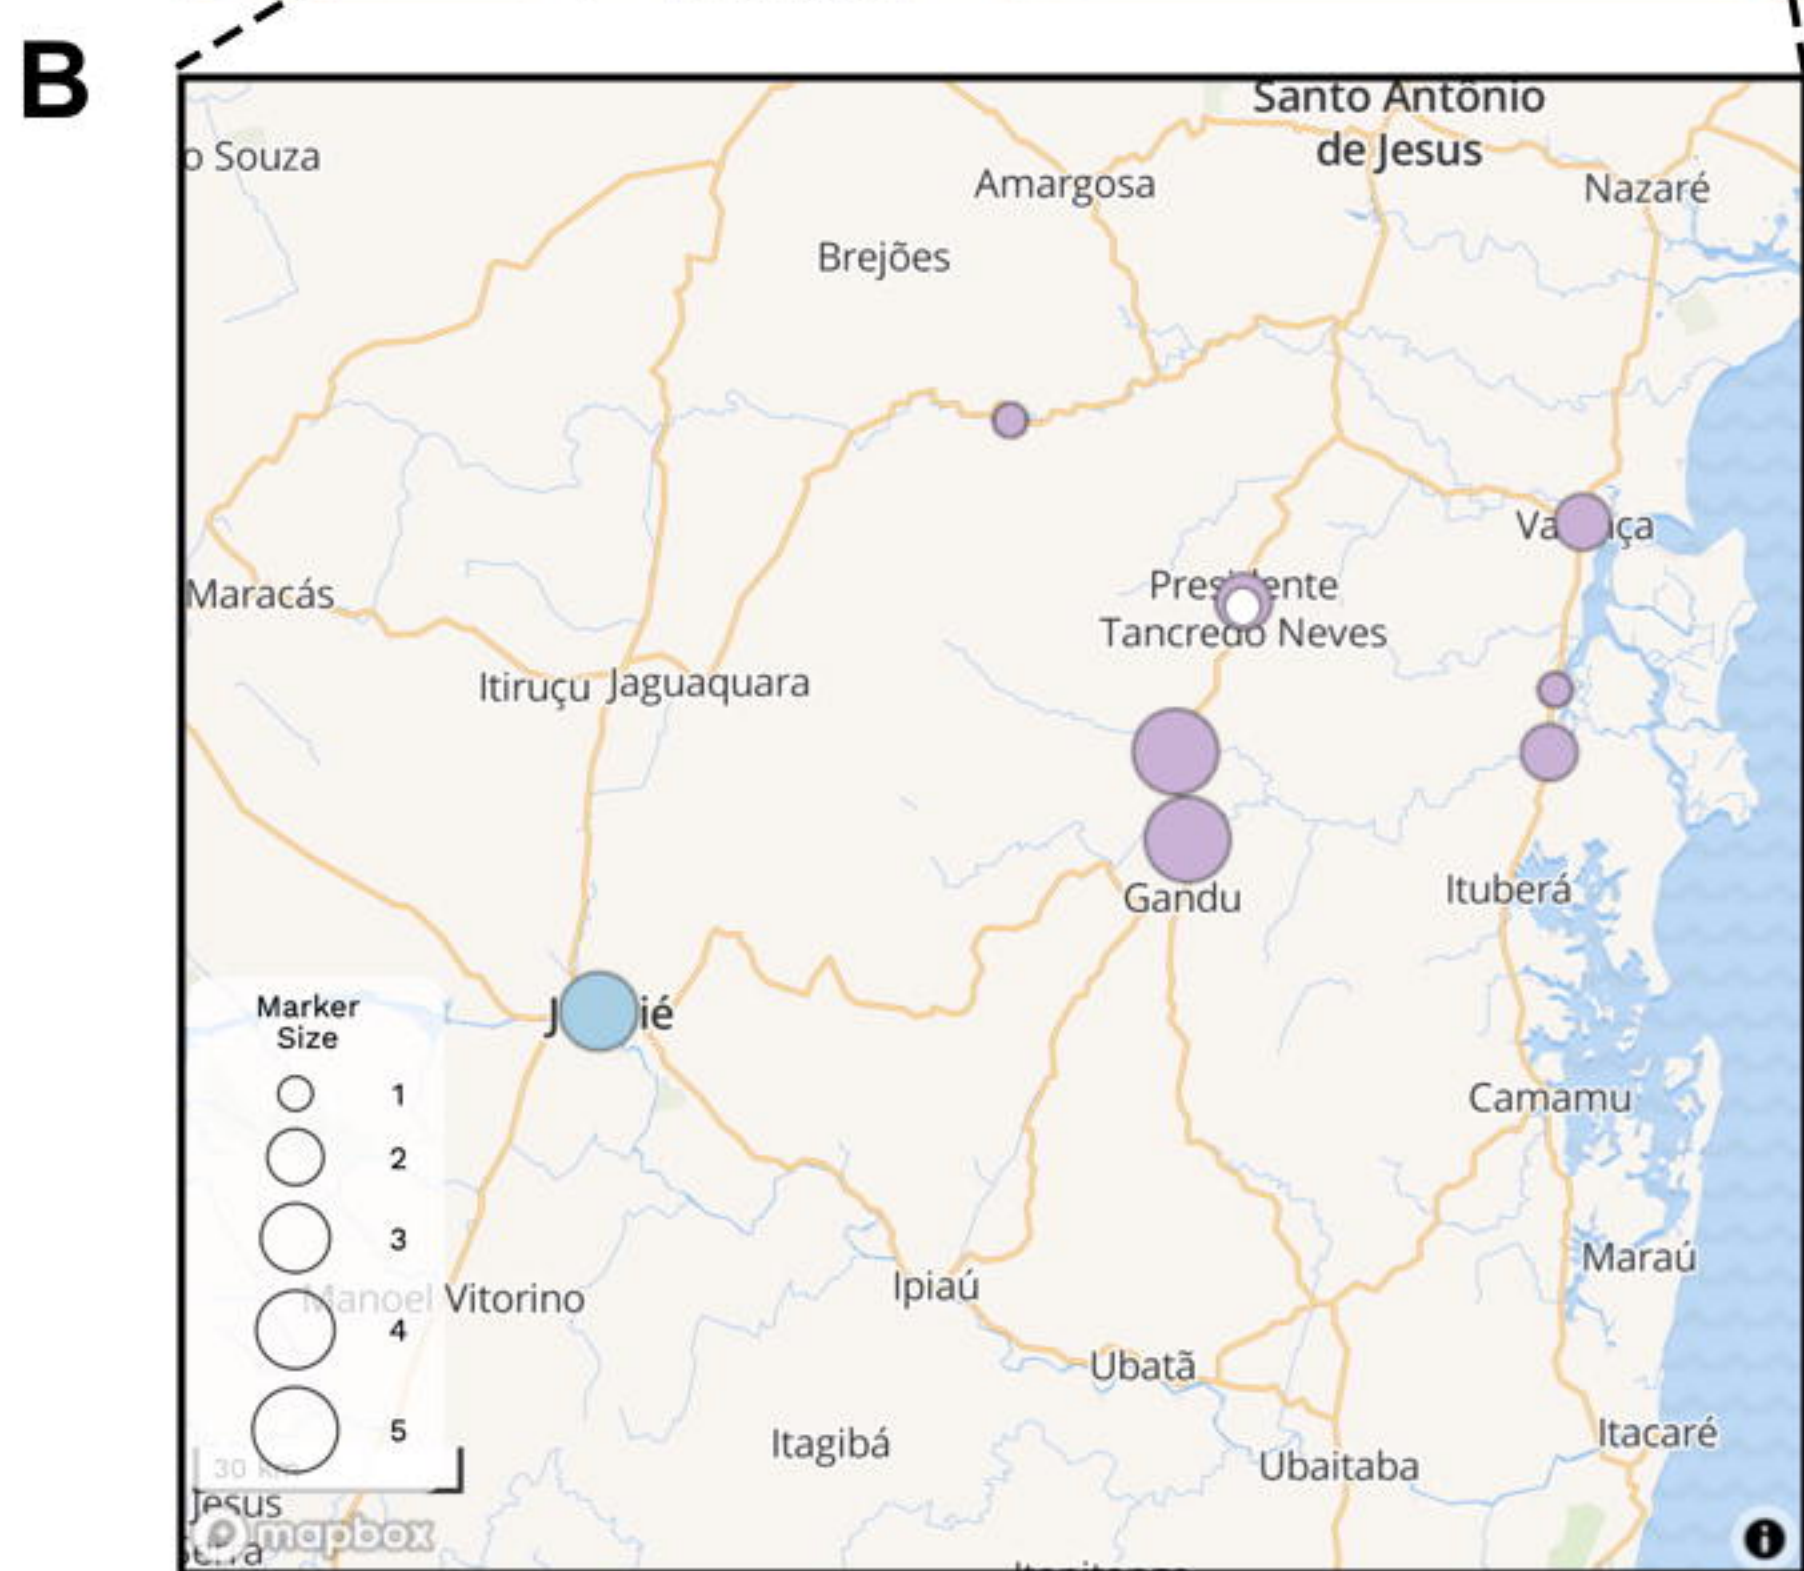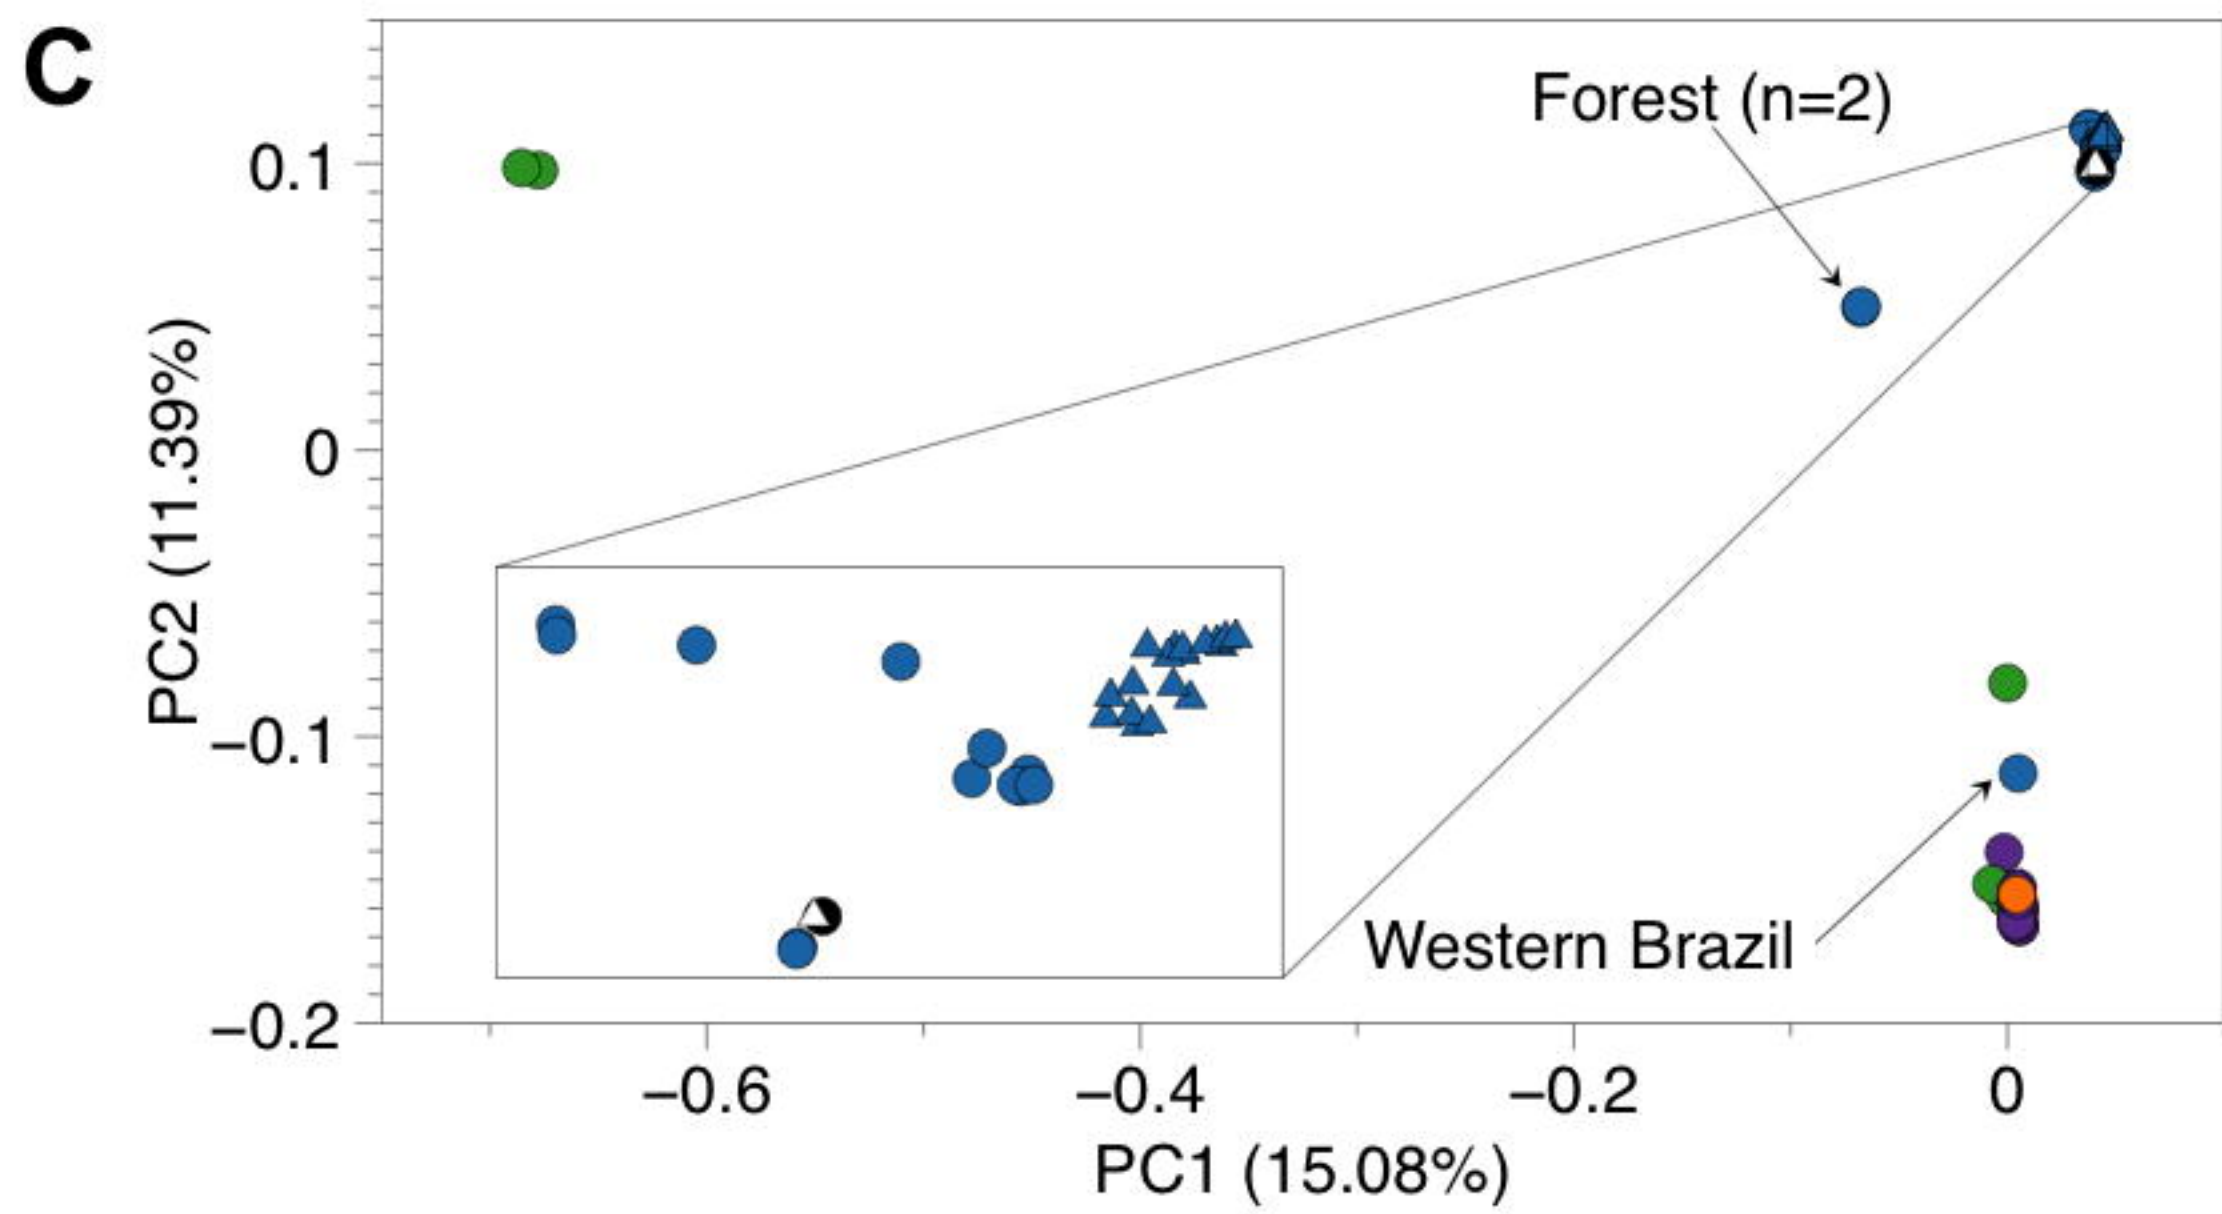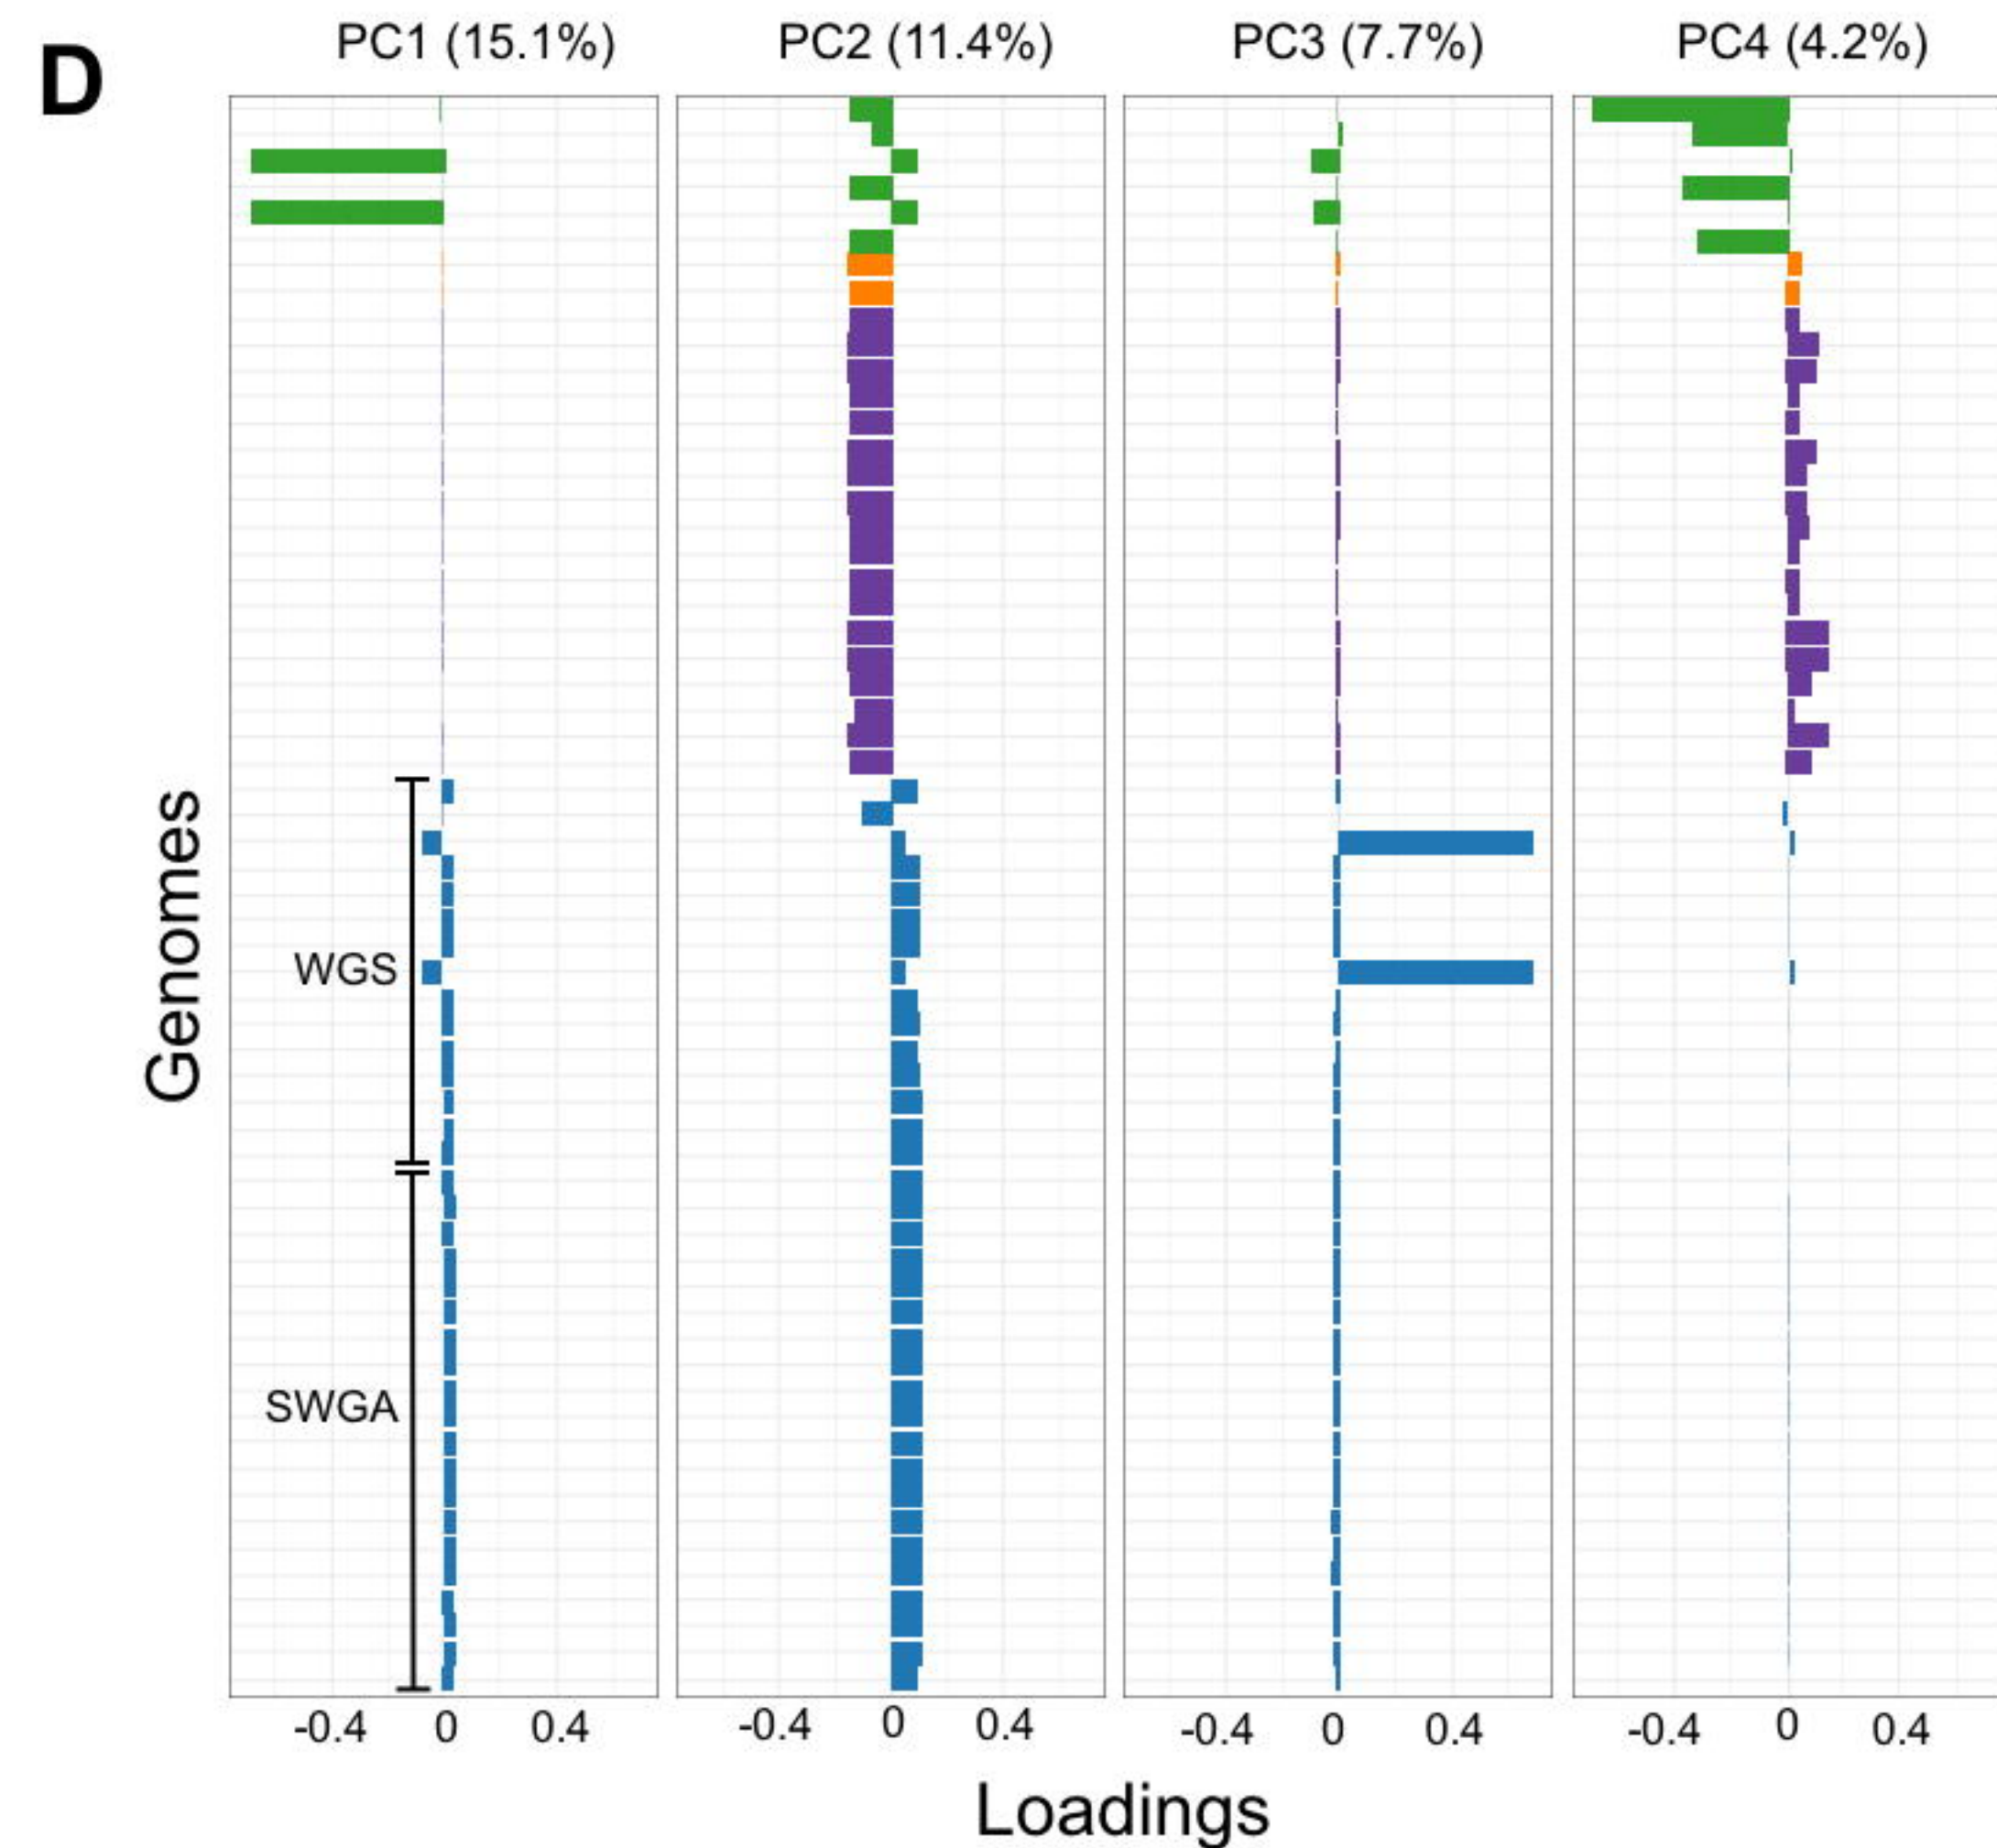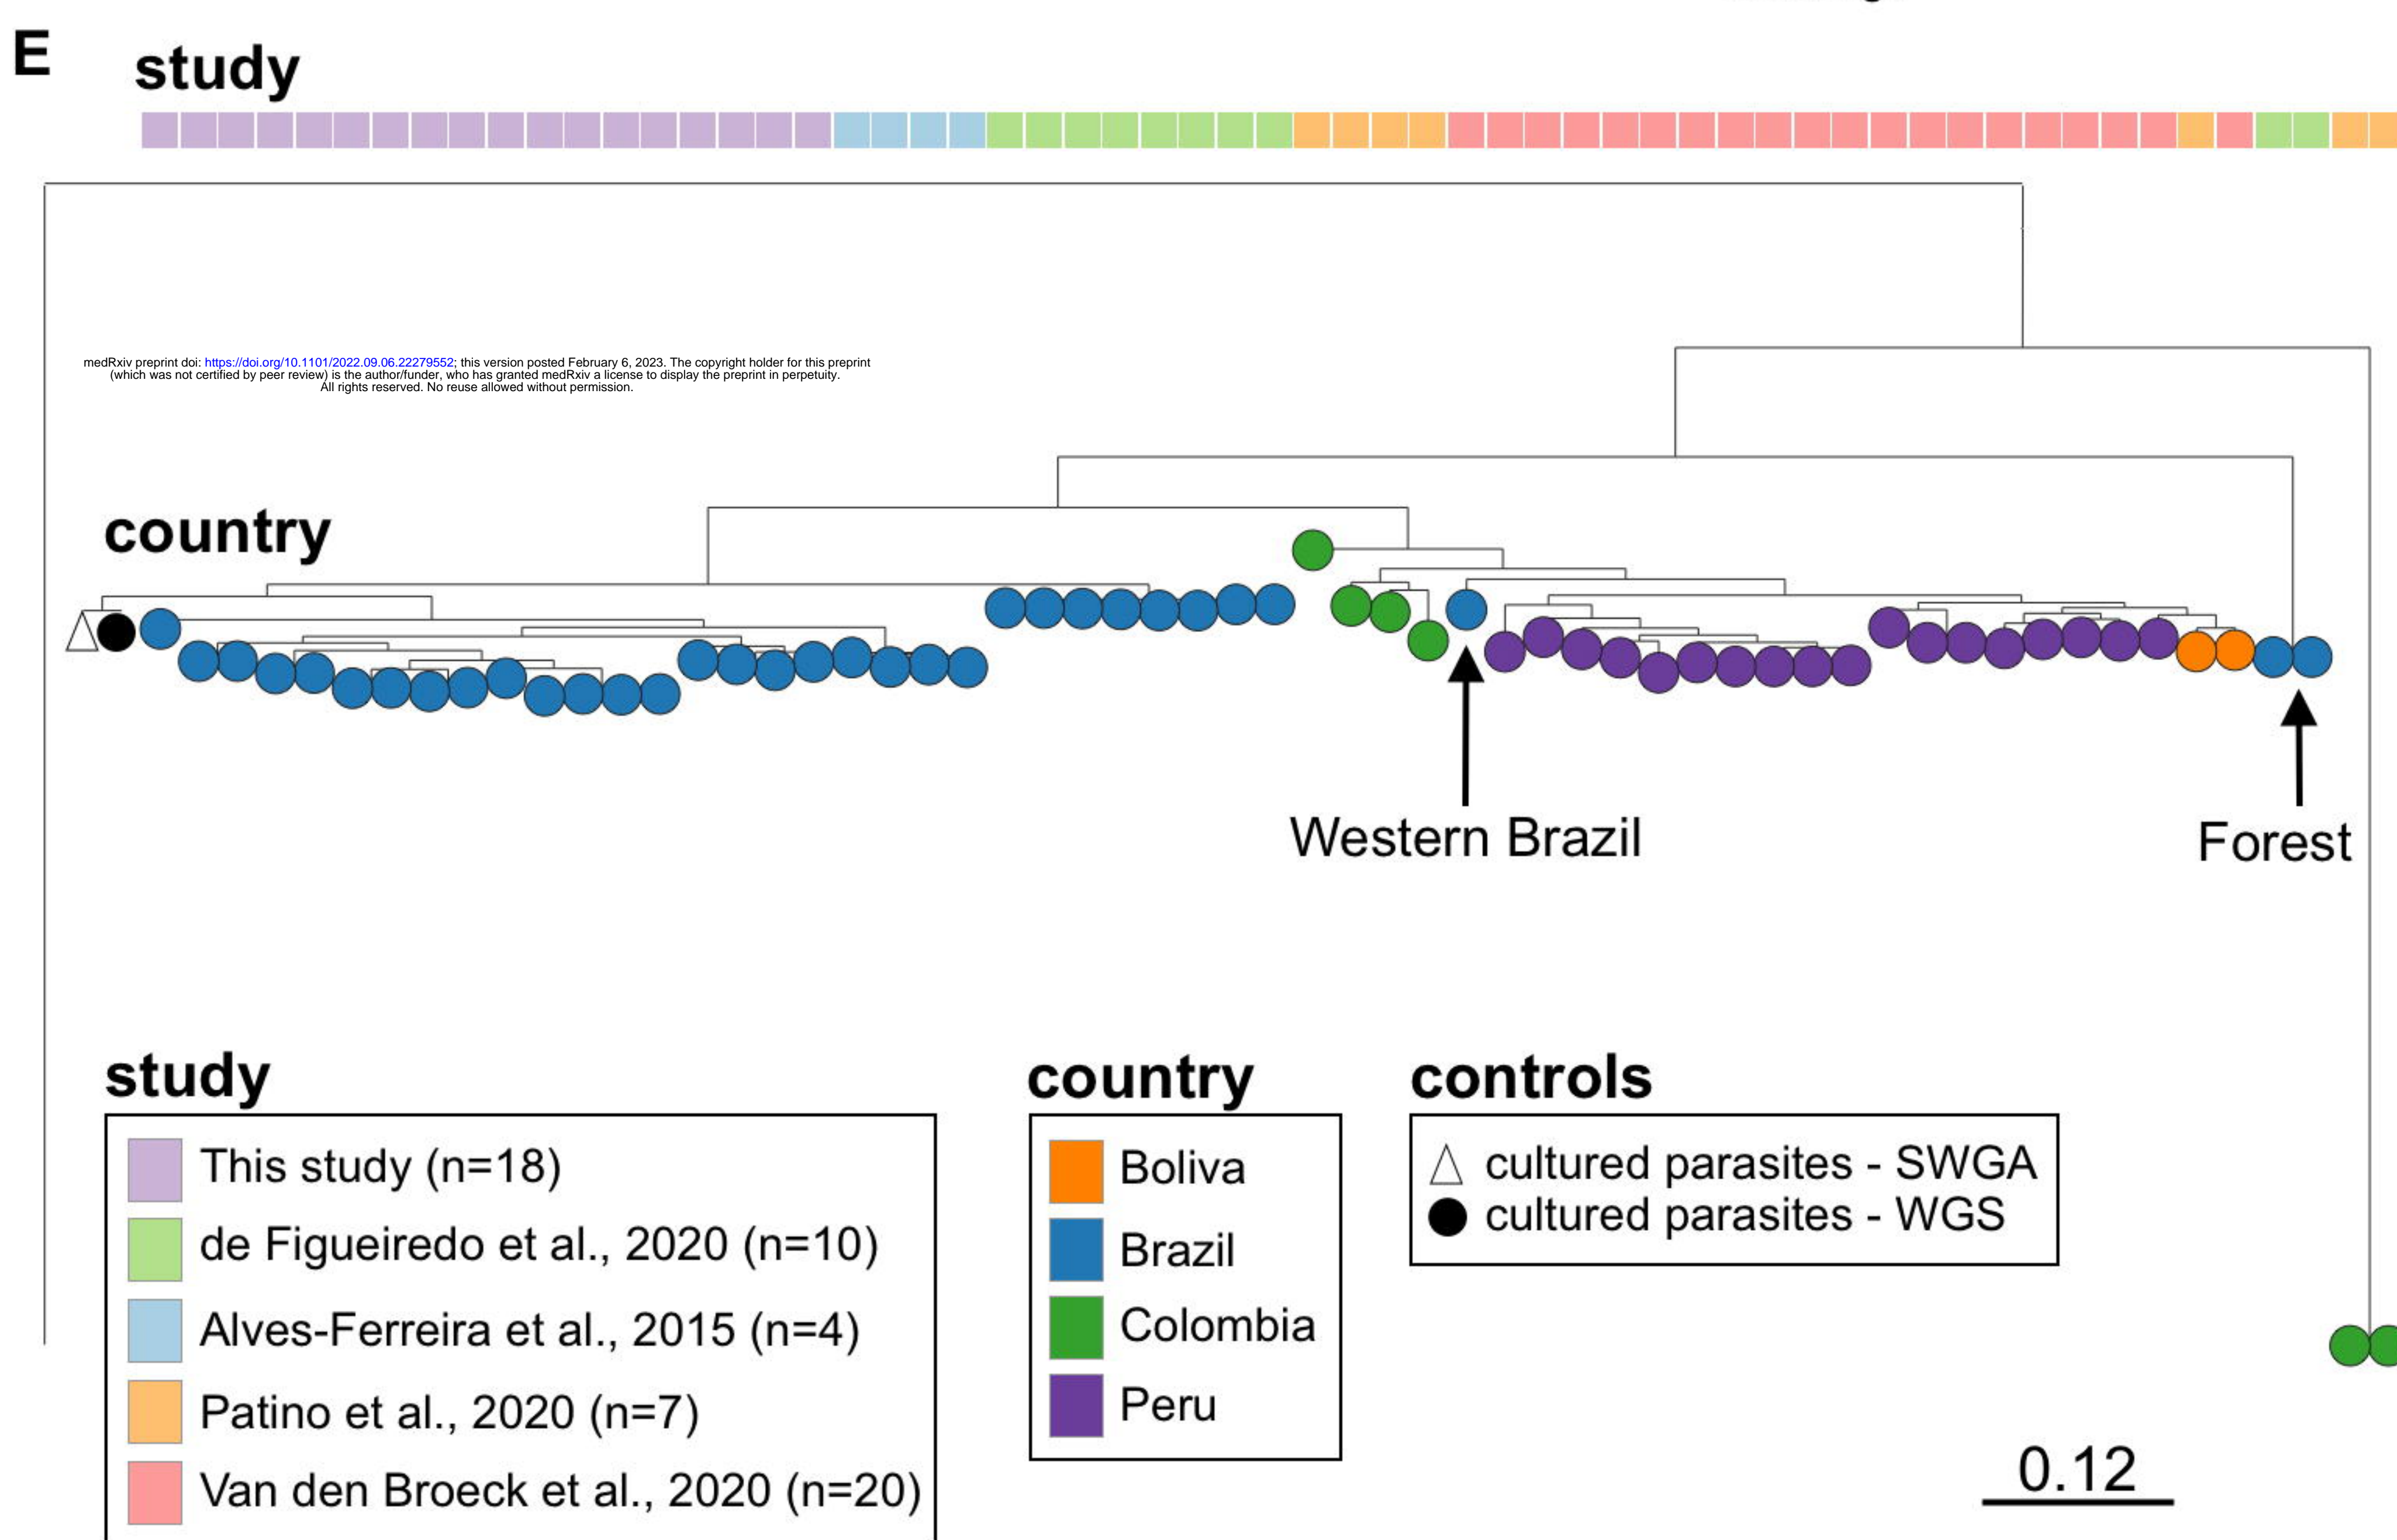



**A**

|                                             | S. America (total) | SWGA (total) | SWGA (new) | NE. Brazil |
|---------------------------------------------|--------------------|--------------|------------|------------|
| <b>Quality <math>\geq</math> 500</b>        | 608,713            | 120,601      | 5,812      | 71,092     |
| <b>Missense</b>                             | 109,264            | 20,724       | 1,204      | 13,831     |
| <b>Frame-shift</b>                          | 634                | 382          | 277        | 316        |
| <b>a This study (n=18)</b>                  | +                  | +            | +          | +          |
| <b>b de Figueiredo et al., 2020 (n=10)</b>  | +                  | -            | -          | +          |
| <b>c Alves-Ferreira et al., 2015 (n=4)</b>  | +                  | -            | -          | +          |
| <b>d Patino et al., 2020 (n=7)</b>          | +                  | -            | -          | -          |
| <b>e Van den Broeck et al., 2020 (n=20)</b> | +                  | -            | -          | -          |

medRxiv preprint doi: <https://doi.org/10.1101/2022.09.06.22279552>; this version posted February 6, 2023. The copyright holder for this preprint (which was not certified by peer review) is the author/funder, who has granted medRxiv a license to display the preprint in perpetuity. All rights reserved. No reuse allowed without permission.

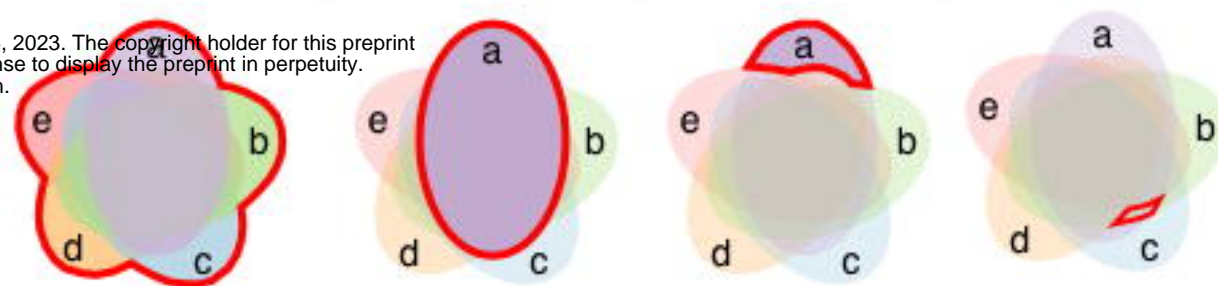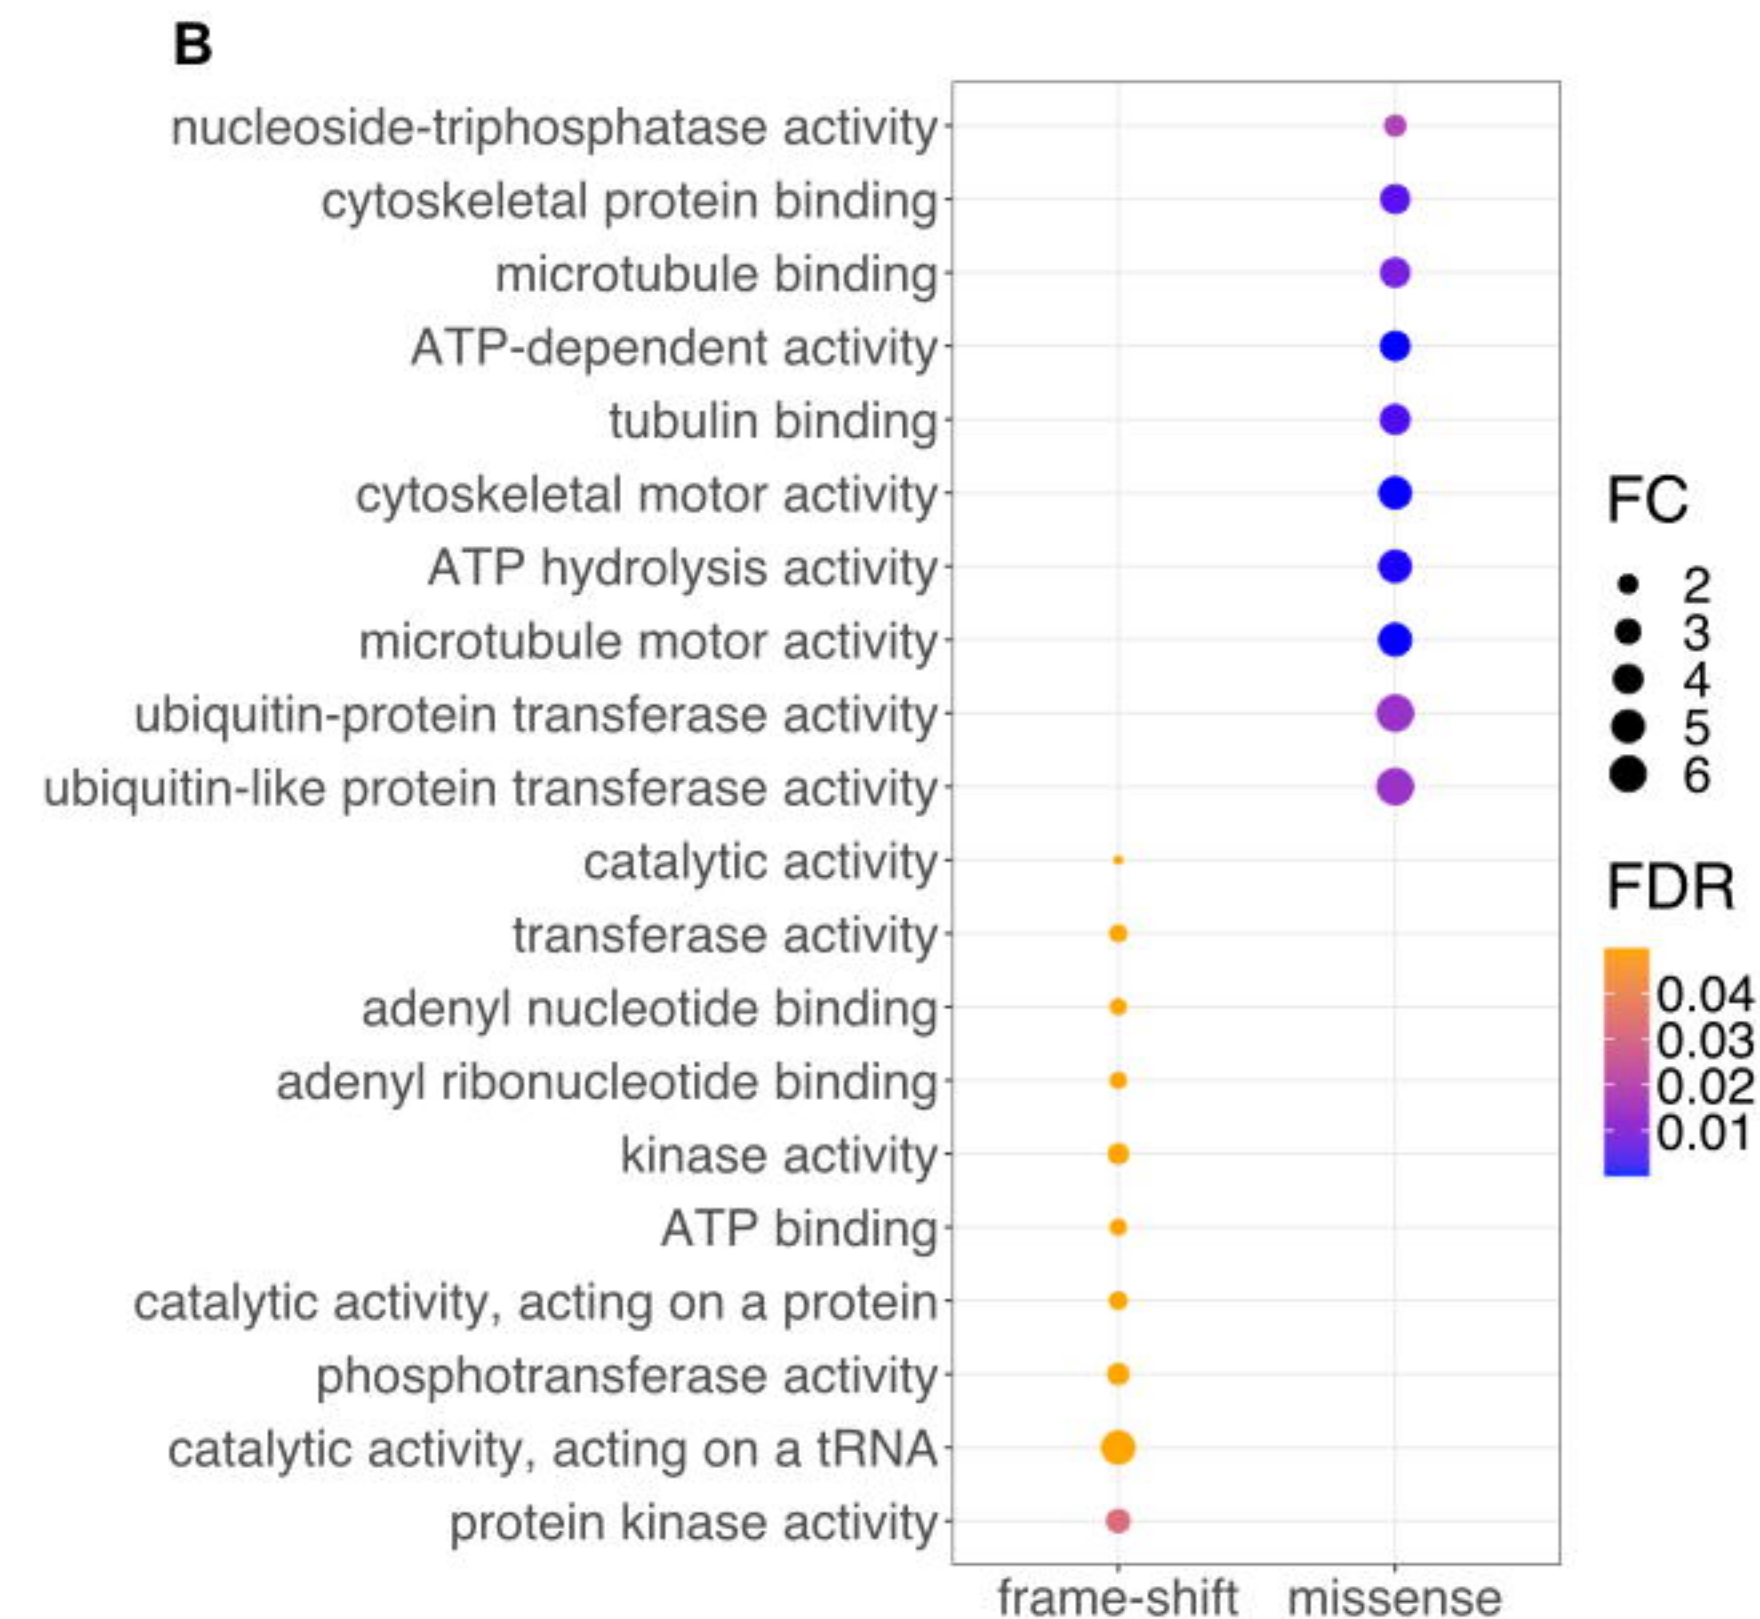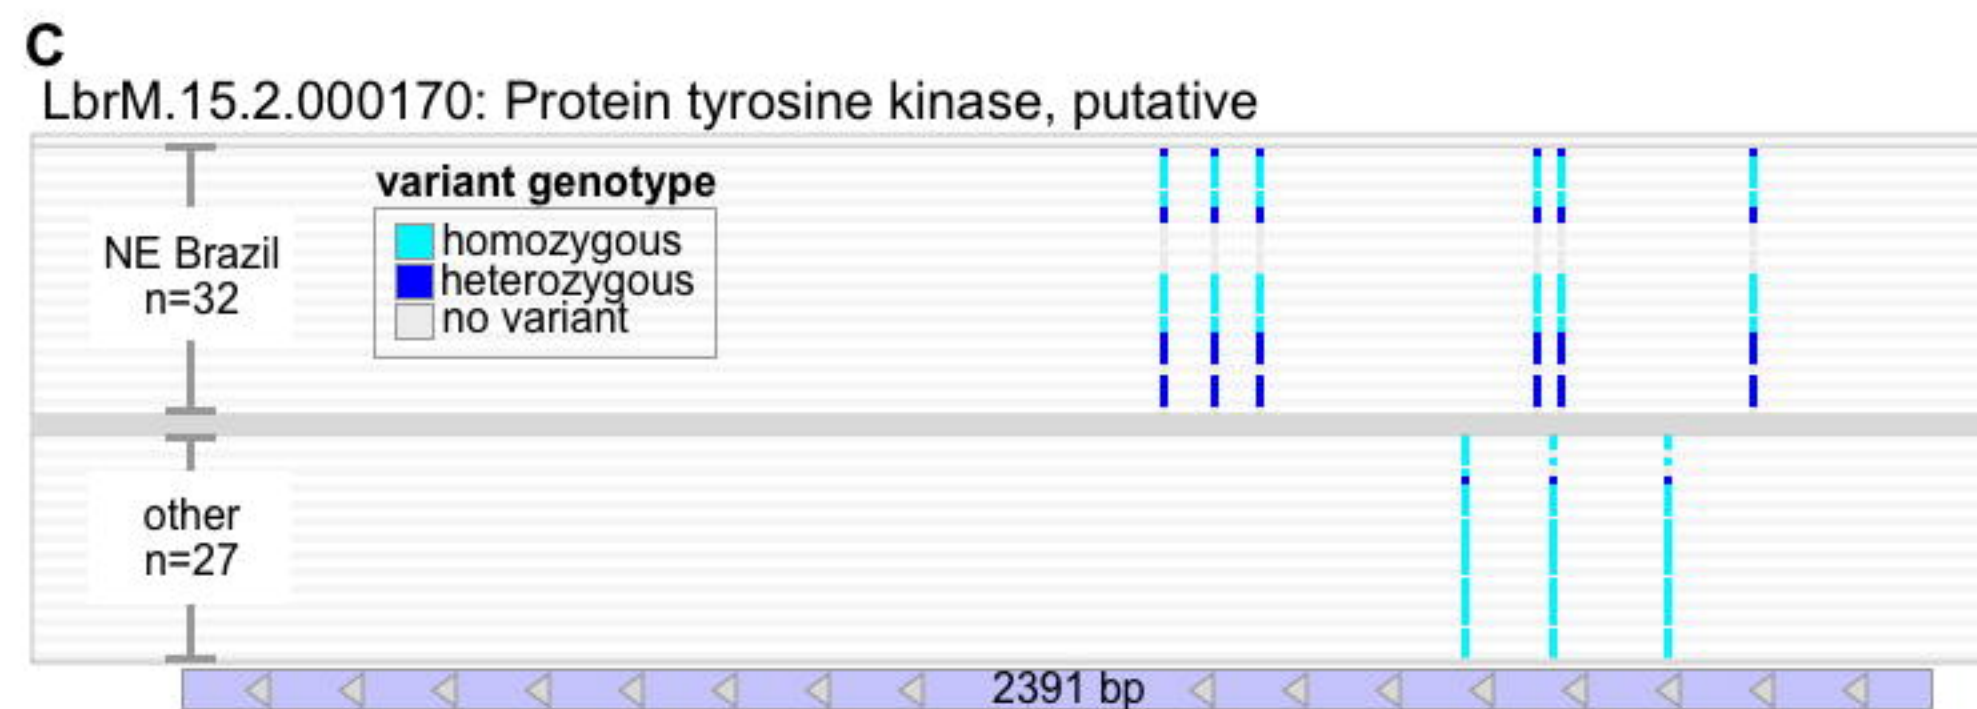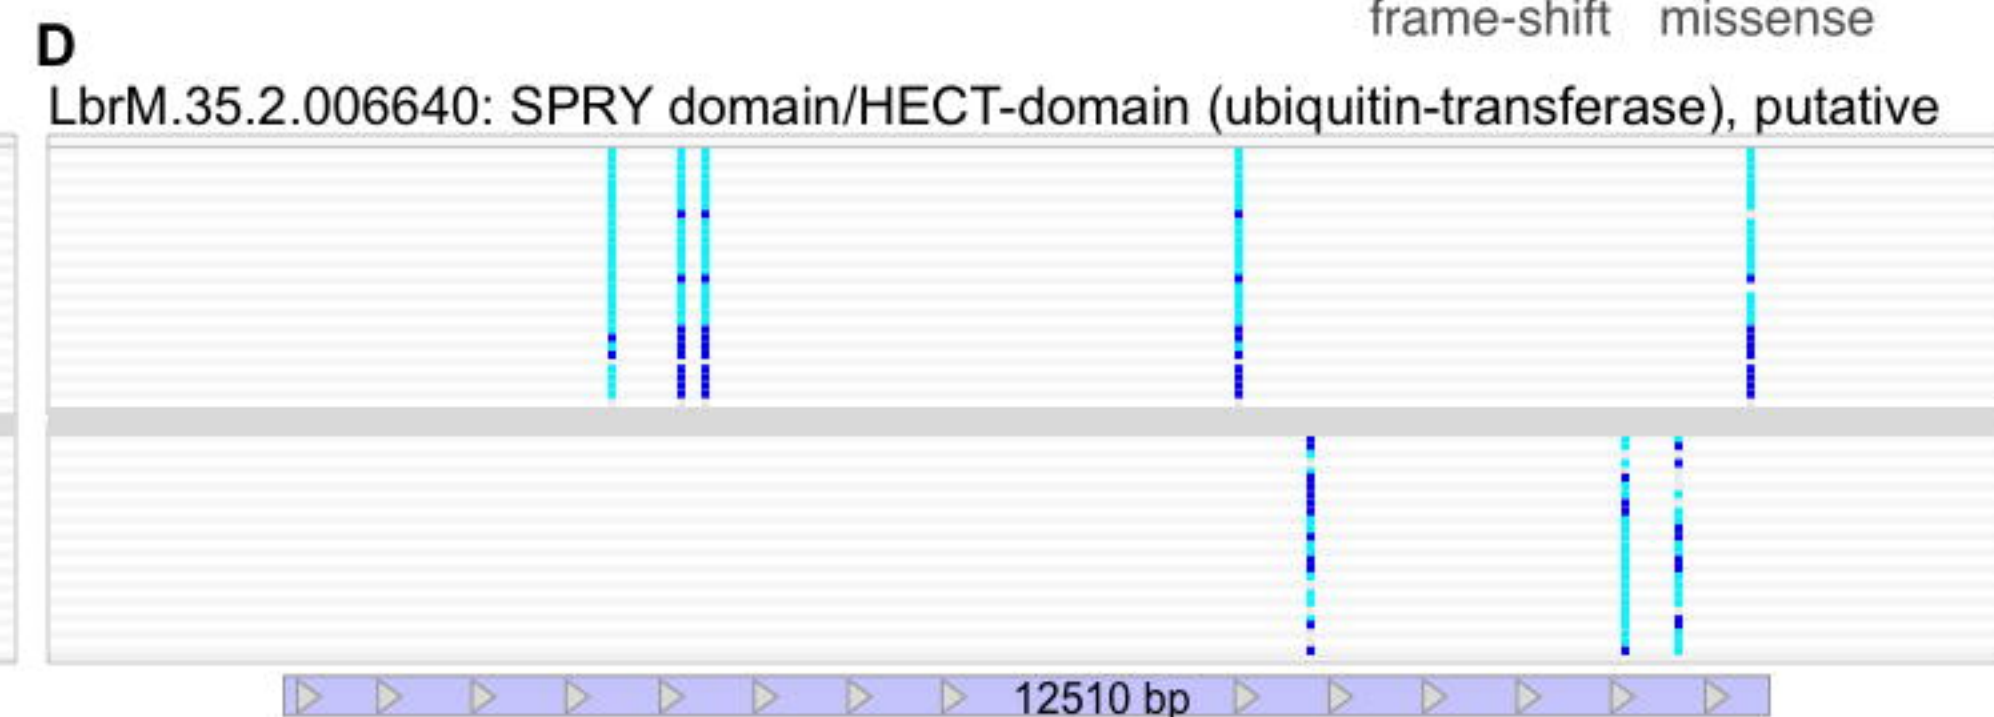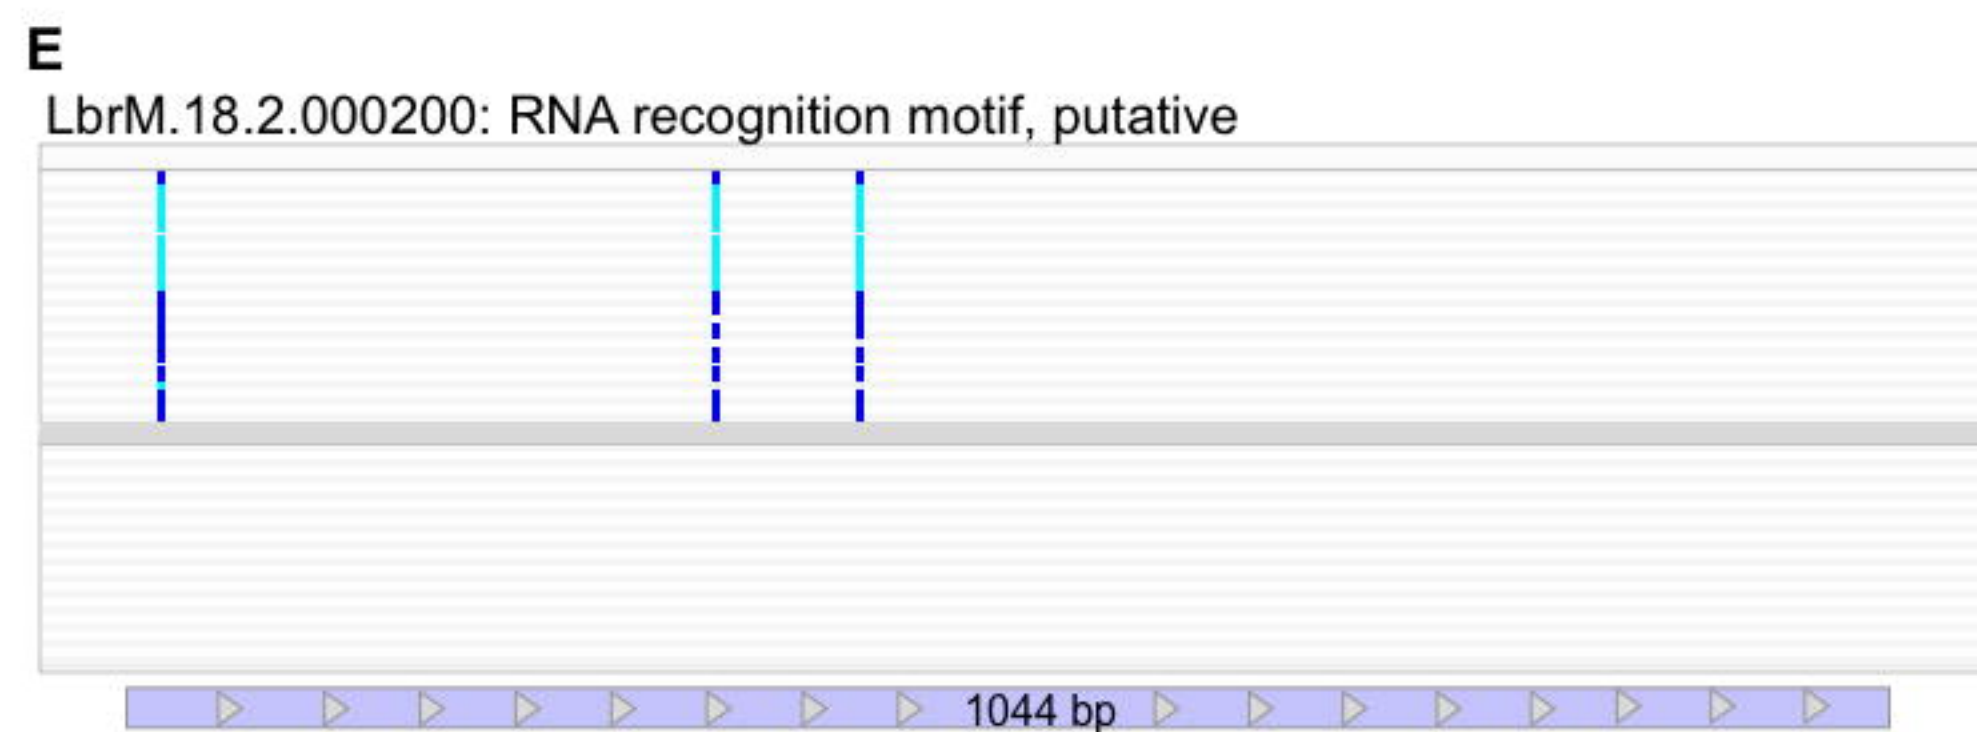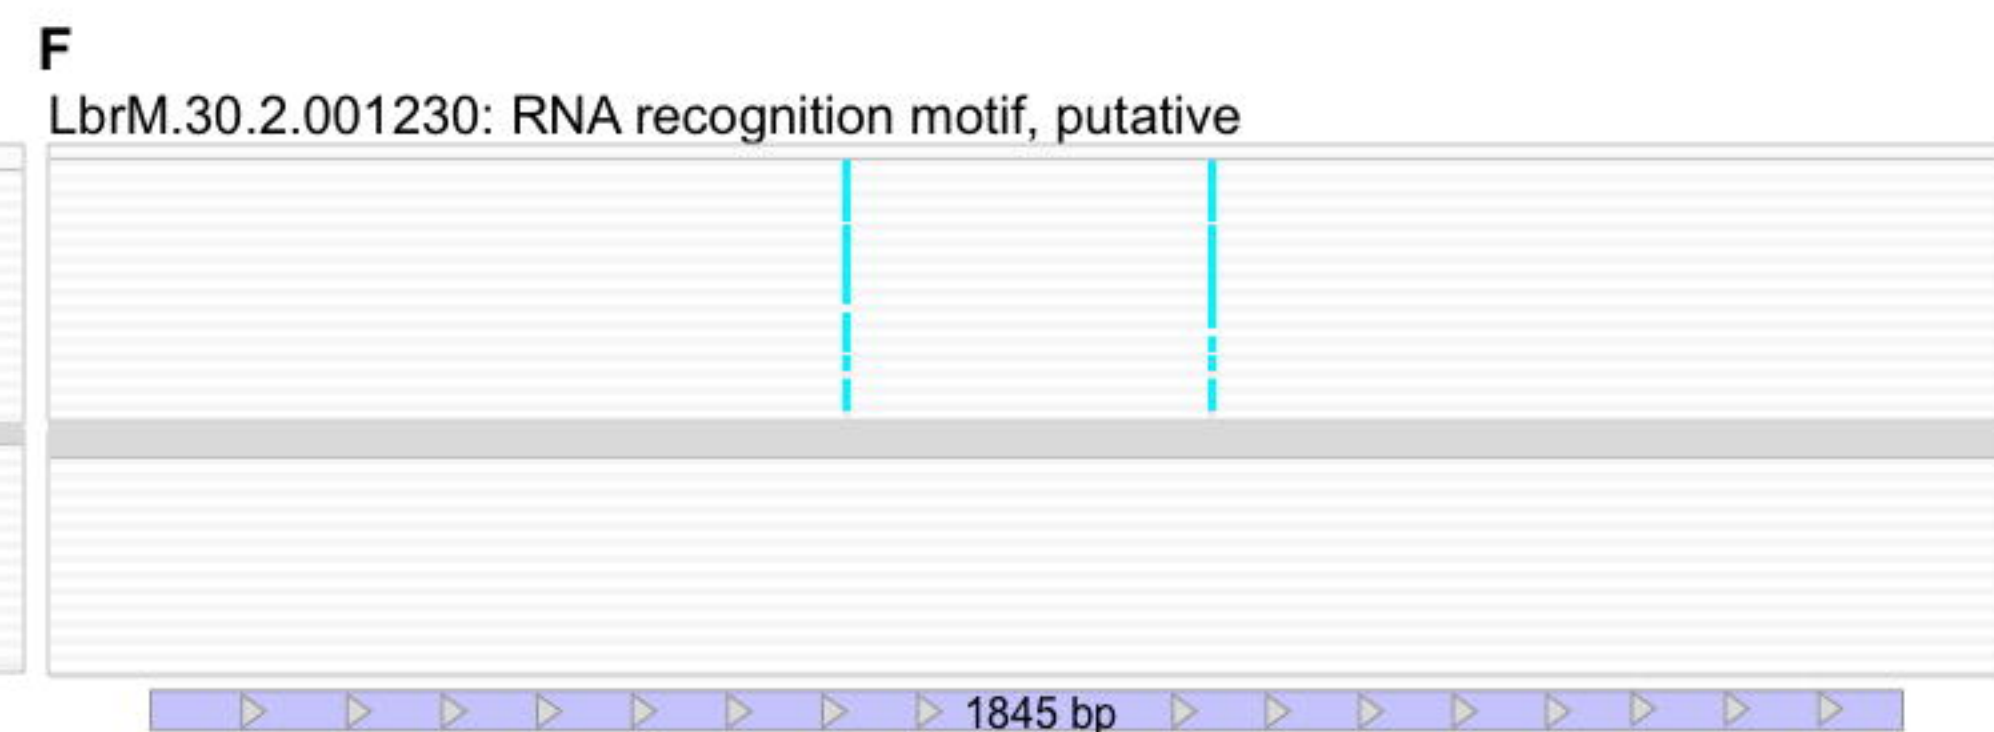

Source: https://medrxiv.org/content/10.1101/2022.09.06.22279552v2.full.pdf
